# Supplementary material for: Efficacy and Safety of Panax notoginseng Saponins in the Treatment of Adults With Ischemic Stroke in China: A Randomized Clinical Trial
Source: PubMed Central journal article supplement — JAMA Netw Open. 2023 Jun 20;6(6):e2317574. doi: 10.1001/jamanetworkopen.2023.17574 (PMC10282883; doi:10.1001/jamanetworkopen.2023.17574), 2023-06-20
Supplement: jamanetwopen-e2317574-s001.pdf [file jamanetwopen-e2317574-s001.pdf]

1 **Efficacy and Safety of Panax Notoginseng Saponins in the Treatment of Adults with Ischemic Stroke in**  
2 **China: A Randomized Placebo-Controlled Clinical Trial**

3  
4  
5  
6  
7  
8  
9  
10  
11  
12  
13  
14  
15  
16  
17  
18  
19  
20  
21  
22  
23  
24  
25  
26  
27  
28  
29  
30  
31  
32

**Study Protocol**

Study Period: From November 2017 to December 2021

Version Number: 1.2

Version Date: March 8<sup>th</sup>, 2018

33  
34  
35  
36  
37  
38  
39  
40  
41  
42  
43  
44  
45  
46  
47  
48  
49  
50  
51  
52  
53  
54  
55  
56  
57  
58  
59  
60  
61  
62  
63  
64  
65  
66  
67  
68  
69  
70  
71  
72

**Table of Contents for Study Protocol**

Summary of Protocol ..... 3  
Abbreviations or Terminology ..... 6  
Main Text ..... 7  
    1. Background ..... 7  
    2. Hypothesis ..... 7  
    3. Patients ..... 7  
        3.1 Sample Size ..... 7  
        3.2 Diagnostic Criteria ..... 7  
        3.3 Inclusion Criteria ..... 8  
        3.4 Exclusion Criteria ..... 8  
    4. Outcomes ..... 9  
        4.1 Primary Efficacy Outcome ..... 9  
        4.2 Secondary Efficacy Outcomes ..... 9  
        4.3 Primary Safety Outcome ..... 9  
        4.4 Secondary Safety Outcomes ..... 9  
    5. Study Design ..... 9  
        5.1 Study Type ..... 10  
        5.2 Randomization ..... 10  
    6. Study Plan and Procedures ..... 10  
        6.1 Visit Schedule ..... 10  
        6.2 Protocol Compliance ..... 12  
    7. Treatment ..... 13  
        7.1 Identification of IMPs ..... 13  
        7.2 IMP Records ..... 14  
        7.3 Storage of IMPs ..... 14  
        7.4 Concomitant Therapy ..... 14  
        7.5 Treatment Compliance and Reliability ..... 15  
        7.6 Discontinuation of IMPs ..... 15  
        7.7 Withdrawal from the Study ..... 16  
    8. Study Management ..... 17  
        8.1 Enrollment and Randomization of Patients ..... 17  
        8.2 Randomization Procedures ..... 17  
        8.3 Procedures of Mistakenly Included or Randomized Patients ..... 17  
        8.4 Blinding and Unblinding Procedures ..... 17  
        8.5 Blind Review ..... 18  
    9. Quality Control (QC) ..... 18  
        9.1 Storage and Auditing of Source Data/Documents ..... 18  
        9.2 Pre-study Task ..... 19  
        9.3 Training of Study Center Personnel ..... 19

|     |                                                                        |    |
|-----|------------------------------------------------------------------------|----|
| 73  | 9.4 Study Monitoring.....                                              | 19 |
| 74  | 9.5 Source Data.....                                                   | 19 |
| 75  | 9.6 Study Progress .....                                               | 19 |
| 76  | 10. AEs .....                                                          | 19 |
| 77  | 10.1 Definition of AEs.....                                            | 19 |
| 78  | 10.2 Observation and Records of AEs .....                              | 20 |
| 79  | 10.3 Severity of AEs.....                                              | 20 |
| 80  | 10.4 Correlation between the AE and Drugs .....                        | 20 |
| 81  | 10.5 SAEs .....                                                        | 21 |
| 82  | 10.6 Record, Management, and Report.....                               | 21 |
| 83  | 10.7 Emergency Procedures .....                                        | 22 |
| 84  | 11. Ethical and Regulatory Requirements.....                           | 22 |
| 85  | 11.1 Independent Ethics Committee Approval .....                       | 22 |
| 86  | 11.2 Patient Information and Informed Consent.....                     | 22 |
| 87  | 11.3 Essential Documents.....                                          | 22 |
| 88  | 12. Data Management .....                                              | 22 |
| 89  | 12.1 Data Acquisition and CRF.....                                     | 22 |
| 90  | 12.2 Data Management Procedures and Tasks.....                         | 23 |
| 91  | 12.3 Data Quality Management .....                                     | 23 |
| 92  | 13. Statistical Analysis and Sample Size.....                          | 24 |
| 93  | 13.1 Analysis Cohorts.....                                             | 24 |
| 94  | 13.2 Statistical Analysis Methods .....                                | 24 |
| 95  | 13.3 Sample Size Determination .....                                   | 25 |
| 96  | 14. Principles for Protocol Amendment .....                            | 26 |
| 97  | 15. Principles and Criteria for Complete Termination of the Trial..... | 26 |
| 98  | 16. Confidentiality .....                                              | 26 |
| 99  | 17. References.....                                                    | 27 |
| 100 | Appendix 1. Diagnostic Criteria for Ischemic Stroke (Excerpts).....    | 29 |
| 101 | Appendix 2. The modified Rankin Scale .....                            | 30 |
| 102 | Appendix 3. The National Institutes of Health Stroke Scale .....       | 31 |
| 103 | Appendix 4. EuroQoL Group 5-Dimension Questionnaire .....              | 35 |
| 104 | Appendix 5. Barthel Index.....                                         | 37 |
| 105 |                                                                        |    |

## Summary of Protocol

|                                         |                                                                                                                                                                                                                                                                                                                                                                                                                                                                                                                                                                                                                                                                                                                                                                                                                                                                                                                                                                                                                                                                                                                                                                                                                                                                                                                                                                                                                                                                                                                                                                                                                                                                                                                                                                                                                                                                                                                                                                                  |
|-----------------------------------------|----------------------------------------------------------------------------------------------------------------------------------------------------------------------------------------------------------------------------------------------------------------------------------------------------------------------------------------------------------------------------------------------------------------------------------------------------------------------------------------------------------------------------------------------------------------------------------------------------------------------------------------------------------------------------------------------------------------------------------------------------------------------------------------------------------------------------------------------------------------------------------------------------------------------------------------------------------------------------------------------------------------------------------------------------------------------------------------------------------------------------------------------------------------------------------------------------------------------------------------------------------------------------------------------------------------------------------------------------------------------------------------------------------------------------------------------------------------------------------------------------------------------------------------------------------------------------------------------------------------------------------------------------------------------------------------------------------------------------------------------------------------------------------------------------------------------------------------------------------------------------------------------------------------------------------------------------------------------------------|
| <b>Title</b>                            | Efficacy and Safety of Panax Notoginseng Saponins in the Treatment of Adults with Ischemic Stroke in China: A Randomized Placebo-Controlled Clinical Trial                                                                                                                                                                                                                                                                                                                                                                                                                                                                                                                                                                                                                                                                                                                                                                                                                                                                                                                                                                                                                                                                                                                                                                                                                                                                                                                                                                                                                                                                                                                                                                                                                                                                                                                                                                                                                       |
| <b>Coordinating centers</b>             | Xuanwu Hospital, Capital Medical University, Dongzhimen Hospital, Beijing University of Chinese Medicine                                                                                                                                                                                                                                                                                                                                                                                                                                                                                                                                                                                                                                                                                                                                                                                                                                                                                                                                                                                                                                                                                                                                                                                                                                                                                                                                                                                                                                                                                                                                                                                                                                                                                                                                                                                                                                                                         |
| <b>Indication</b>                       | Ischemic stroke                                                                                                                                                                                                                                                                                                                                                                                                                                                                                                                                                                                                                                                                                                                                                                                                                                                                                                                                                                                                                                                                                                                                                                                                                                                                                                                                                                                                                                                                                                                                                                                                                                                                                                                                                                                                                                                                                                                                                                  |
| <b>Study objective</b>                  | To investigate the efficacy and safety of panax notoginseng saponins in patients with ischemic stroke                                                                                                                                                                                                                                                                                                                                                                                                                                                                                                                                                                                                                                                                                                                                                                                                                                                                                                                                                                                                                                                                                                                                                                                                                                                                                                                                                                                                                                                                                                                                                                                                                                                                                                                                                                                                                                                                            |
| <b>Study design</b>                     | A randomized, double-blind, placebo-controlled, multi-center, clinical study                                                                                                                                                                                                                                                                                                                                                                                                                                                                                                                                                                                                                                                                                                                                                                                                                                                                                                                                                                                                                                                                                                                                                                                                                                                                                                                                                                                                                                                                                                                                                                                                                                                                                                                                                                                                                                                                                                     |
| <b>Sample size</b>                      | 3000 patients in total (1500 patients per group)                                                                                                                                                                                                                                                                                                                                                                                                                                                                                                                                                                                                                                                                                                                                                                                                                                                                                                                                                                                                                                                                                                                                                                                                                                                                                                                                                                                                                                                                                                                                                                                                                                                                                                                                                                                                                                                                                                                                 |
| <b>Inclusion and Exclusion criteria</b> | <p><b>Inclusion criteria:</b></p> <ol style="list-style-type: none"> <li>1. Aged 18–75 years;</li> <li>2. Clinical diagnosis of ischemic stroke within 14 days of symptom onset;</li> <li>3. Pre-stroke mRS <math>\leq 1</math>;</li> <li>4. <math>4 \leq \text{NIHSS} \leq 15</math>;</li> <li>5. Signed written informed consent.</li> </ol> <p><b>Exclusion criteria:</b></p> <ol style="list-style-type: none"> <li>1. Hemorrhage or other pathologic brain disorders such as vascular malformations, tumors, abscesses, encephalitis, or other common non-ischemic brain diseases (e.g., multiple sclerosis) confirmed by head computed tomography/magnetic resonance imaging;</li> <li>2. Had contraindications to panax notoginseng saponins: <ol style="list-style-type: none"> <li>1) Known allergy history;</li> <li>2) Known allergy to agents including aspirin, salicylates, or any other ingredients of medicine included in the study;</li> <li>3) With a medical history of asthma caused by salicylates or substances containing salicylic acid, or non-steroidal anti-inflammatory drugs;</li> <li>4) Active peptic ulcers;</li> <li>5) Severe hepatic insufficiency or renal insufficiency; (alanine aminotransferase <math>&gt; 2 \times</math> upper limit of normal, or aspartate aminotransferase <math>&gt; 2 \times</math> upper limit of normal; creatinine <math>&gt; 1.5 \times</math> upper limit of normal);</li> <li>6) Severe cardiac failure;</li> <li>7) With a prior medical history of coagulopathy or systemic hemorrhages;</li> <li>8) With a prior medical history of thrombocytopenia or neutropenia;</li> <li>9) With a prior medical history of drug-induced blood system diseases or abnormal hepatic function;</li> <li>10) Leukopenia (<math>&lt; 2 \times 10^9/\text{L}</math>) or thrombocytopenia (<math>&lt; 100 \times 10^9/\text{L}</math>);</li> <li>11) Female in the gestation or lactation period.</li> </ol> </li> </ol> |

|                                |                                                                                                                                                                                                                                                                                                                                                                                                                                                                                                                                                                                                                                                                                                                                                                                                                                                                                                                                                                                                                                                                                                                                                                                                                                                                                                                                                                                                                                                                                                                                                                                                                                                                                                                                                                                                                                                                       |
|--------------------------------|-----------------------------------------------------------------------------------------------------------------------------------------------------------------------------------------------------------------------------------------------------------------------------------------------------------------------------------------------------------------------------------------------------------------------------------------------------------------------------------------------------------------------------------------------------------------------------------------------------------------------------------------------------------------------------------------------------------------------------------------------------------------------------------------------------------------------------------------------------------------------------------------------------------------------------------------------------------------------------------------------------------------------------------------------------------------------------------------------------------------------------------------------------------------------------------------------------------------------------------------------------------------------------------------------------------------------------------------------------------------------------------------------------------------------------------------------------------------------------------------------------------------------------------------------------------------------------------------------------------------------------------------------------------------------------------------------------------------------------------------------------------------------------------------------------------------------------------------------------------------------|
|                                | <ol style="list-style-type: none"> <li>3. With indications for anticoagulation (suspected cardioembolism, such as atrial fibrillation, prosthetic heart valve, and suspected endocarditis);</li> <li>4. With a medical history of intracranial hemorrhage or cerebral amyloid angiopathy;</li> <li>5. With a medical history of aneurysm (including intracranial aneurysm and peripheral aneurysm);</li> <li>6. Confirmed or suspected acute coronary syndrome;</li> <li>7. High-risk bradyarrhythmia such as sick sinus syndrome with second- or third-degree atrioventricular conduction block, and bradycardia-related syncope induced by not installing a cardiac pacemaker;</li> <li>8. With a history of gastrointestinal hemorrhage within 3 months prior to randomization, or undergoing a major surgery within 30 days prior to randomization;</li> <li>9. Expected to receive endovascular treatment or operative treatment in the next 3 months;</li> <li>10. Required to terminate the trial drug due to other scheduled surgery or interventional treatments;</li> <li>11. Patients had severe non-cardiovascular or cerebrovascular diseases with a life expectancy of less than 3 months;</li> <li>12. Women of childbearing age showing negative pregnancy test but refusing to take effective contraception measures;</li> <li>13. Currently receiving an investigational drug or being involved in a device experiment;</li> <li>14. Participated in other drug clinical trials and received other investigated medicinal products (IMPs) within 30 days before randomization;</li> <li>15. Unable to understand and/or comply with the study procedures and/or follow-up due to psychiatric disorders, cognitive, or mental disorders;</li> <li>16. Patients are not eligible for this clinical trial as evaluated by the investigator.</li> </ol> |
| <b>IMPs</b>                    | <p>Xuesaitong soft capsules; Specification: 0.33 g/capsule; Dosage form: soft capsule<br/> Manufacturer: China Resources Kunming Shenghuo Pharmaceutical Co., Ltd.</p> <p>Xuesaitong soft capsules placebo; Specification: 0.33g/capsule; Dosage form: soft capsule<br/> Manufacturer: China Resources Kunming Shenghuo Pharmaceutical Co., Ltd.</p>                                                                                                                                                                                                                                                                                                                                                                                                                                                                                                                                                                                                                                                                                                                                                                                                                                                                                                                                                                                                                                                                                                                                                                                                                                                                                                                                                                                                                                                                                                                  |
| <b>Intervention</b>            | <p>Eligible patients will be randomized into an XST group and a control group at a ratio of 1:1, to receive Xuesaitong soft capsules or placebo for 3 months.</p> <p><b>XST group:</b><br/> Xuesaitong soft capsules 60 mg/capsule, 120 mg per time, twice daily</p> <p><b>Control group:</b><br/> Xuesaitong soft capsules placebo 60 mg/capsule, 120 mg per time, twice daily</p>                                                                                                                                                                                                                                                                                                                                                                                                                                                                                                                                                                                                                                                                                                                                                                                                                                                                                                                                                                                                                                                                                                                                                                                                                                                                                                                                                                                                                                                                                   |
| <b>Blinding</b>                | The IMPs and placebo will be identical in color, appearance, and packaging.                                                                                                                                                                                                                                                                                                                                                                                                                                                                                                                                                                                                                                                                                                                                                                                                                                                                                                                                                                                                                                                                                                                                                                                                                                                                                                                                                                                                                                                                                                                                                                                                                                                                                                                                                                                           |
| <b>Route of administration</b> | Oral                                                                                                                                                                                                                                                                                                                                                                                                                                                                                                                                                                                                                                                                                                                                                                                                                                                                                                                                                                                                                                                                                                                                                                                                                                                                                                                                                                                                                                                                                                                                                                                                                                                                                                                                                                                                                                                                  |

|                          |                                                                                                                                                                                                                                                                                                                                                                                                                                                                                                                                                                                                                                                                                                                                                                                                                                                                                                                                                                                                                                                                                                                                                                                                                                                                                                                                                                  |
|--------------------------|------------------------------------------------------------------------------------------------------------------------------------------------------------------------------------------------------------------------------------------------------------------------------------------------------------------------------------------------------------------------------------------------------------------------------------------------------------------------------------------------------------------------------------------------------------------------------------------------------------------------------------------------------------------------------------------------------------------------------------------------------------------------------------------------------------------------------------------------------------------------------------------------------------------------------------------------------------------------------------------------------------------------------------------------------------------------------------------------------------------------------------------------------------------------------------------------------------------------------------------------------------------------------------------------------------------------------------------------------------------|
| <b>Efficacy outcomes</b> | <p><b>Primary outcome:</b><br/>Proportion of patients with functional independence (modified Rankin scale (mRS) <math>\leq 2</math>) at 3 months after randomization.</p> <p><b>Secondary outcomes:</b></p> <ol style="list-style-type: none"> <li>1. Proportion of patients with recurrent stroke (ischemic stroke and intracerebral hemorrhage) at 3 months and 12 months after randomization;</li> <li>2. Proportion of patients with functional independence (mRS <math>\leq 2</math>) at 12 months after randomization;</li> <li>3. Proportion of patients with no or minimal disability (mRS <math>\leq 1</math>) at 3 months and 12 months after randomization;</li> <li>4. Change in National Institutes of Health Stroke Scale score at 3 months after randomization;</li> <li>5. Proportion of composite cerebrovascular events (ischemic stroke, intracerebral hemorrhage, myocardial infarction, and vascular death) at 3 months and 12 months after randomization;</li> <li>6. Difference of EuroQoL Group 5-Dimension score at 3 months and 12 months after randomization;</li> <li>7. Change in Barthel Index score at 3 months and 12 months after randomization;</li> <li>8. Difference in platelet counts and coagulation indicators (prothrombin time, and activated partial thromboplastin time) at 3 months after randomization.</li> </ol> |
| <b>Safety outcomes</b>   | <p><b>Primary safety outcome:</b><br/>Incidence of serious adverse events within 3 months of treatment.</p> <p><b>Secondary safety outcomes:</b></p> <ol style="list-style-type: none"> <li>1. Incidence of symptomatic intracranial hemorrhage within 3 months of treatment;</li> <li>2. Incidence of all-cause mortality within 3 months of treatment;</li> <li>3. Incidence of adverse events within 3 months of treatment.</li> </ol>                                                                                                                                                                                                                                                                                                                                                                                                                                                                                                                                                                                                                                                                                                                                                                                                                                                                                                                        |

**Abbreviations or Terminology**

| <b>Abbreviations or Terminology</b> | <b>Description</b>                                                                      |
|-------------------------------------|-----------------------------------------------------------------------------------------|
| AE                                  | Adverse Event                                                                           |
| BI                                  | Barthel Index                                                                           |
| CFDA                                | China Food and Drug Administration (now National Medical Products Administration, NMPA) |
| CRA                                 | Clinical Research Associate                                                             |
| CRF                                 | Case Report Form                                                                        |
| CT                                  | Computed Tomography                                                                     |
| DSMB                                | Data and Safety Monitoring Board                                                        |
| ECG                                 | Electrocardiograph                                                                      |
| EQ-5D                               | EuroQoL Group 5-Dimension                                                               |
| GCP                                 | Good Clinical Practice                                                                  |
| HR                                  | Hazard Ratio                                                                            |
| ICF                                 | Informed Consent Form                                                                   |
| IMP                                 | Investigational Medicinal Product                                                       |
| MRI                                 | Magnetic Resonance Imaging                                                              |
| mRS                                 | modified Rankin Scale                                                                   |
| NIHSS                               | National Institutes of Health Stroke Scale                                              |
| OR                                  | Odds Ratio                                                                              |
| PTDV                                | Premature Treatment Discontinuation Visit                                               |
| QC                                  | Quality Control                                                                         |
| SAE                                 | Serious Adverse Event                                                                   |

## 111 1. Background

112 Stroke is characterized by high morbidity, disability, and mortality, and has become one of the major threats to  
113 human health. The Global Burden of Disease Study showed that ischemic heart disease and stroke were the top  
114 causes of death globally between 1990 and 2010. Meanwhile, the burden of disease study in China showed that  
115 stroke was the leading cause of deaths among the Chinese in 2010, accounting for 29.4% of stroke-caused  
116 deaths worldwide. Ischemic stroke accounts for approximately 70% of all strokes. However, there is a lack of  
117 effective neuroprotective agents for ischemic stroke. Therefore, the development of a scientific and inexpensive  
118 neuroprotective agent with few adverse effects has become a research hotspot in the treatment of ischemic  
119 stroke.

120 Currently, the Chinese economy has entered a new era of development, with the status and role of the  
121 traditional Chinese medicine in the economic and social development gaining increasing importance. The  
122 revitalization and development of the traditional Chinese medicine are about to embrace a historic opportunity  
123 with favorable international and domestic environment while receiving popular support. In recent years, scholars  
124 have recommended the use of traditional Chinese medicine more often in the prevention and treatment of  
125 cardiovascular and cerebrovascular diseases.

126 Xuesaitong soft capsules (XST; trade name: LI XU WANG®) are prepared from an active ingredient - panax  
127 notoginseng saponins from the famous and precious medical herb - panax notoginseng. It was formally launched  
128 in the market in June 1999 after obtaining a new drug certificate and production approval issued by the China  
129 Food and Drug Administration (CFDA, now National Medical Products Administration, NMPA). After more  
130 than 10 years of development, production and clinical application, the safety of this product is proved to be good  
131 with low incidence of adverse events (AEs). The statistics of the National Adverse Drug Reaction Monitoring  
132 System in China showed that, from 2011 to May 2017, a total of 119 cases of AEs were reported, mostly  
133 gastrointestinal reactions, dizziness, headache, rash, anaphylactoid reactions, palpitations, and nausea. Ever  
134 since it has been marketed, XST have displayed significant protective effects in cardiovascular and  
135 cerebrovascular diseases, and have been widely used in treating ischemic stroke. The pharmacological studies  
136 proved that panax notoginseng saponin has a wide range of biological activities and can significantly reduce  
137 hematocrit and fibrinogen content in the blood to reduce the blood viscosity; Rgl, an important component of  
138 panax notoginseng saponins, can significantly inhibit platelet aggregation and stimulate a reduction of the  
139 hematocrit and fibrin content in the blood and effectively prevent thrombosis. Patients with ischemic stroke who  
140 were treated with XST in addition to conventional treatment showed significantly better recovery of  
141 neurological function and improvement of daily living ability than the control group.

142 This multicenter, randomized, double-blind, controlled clinical trial aims to provide more evidence on the use  
143 of medications for neuroprotection in patients with ischemic stroke to further investigate the efficacy and safety  
144 of XST.

## 145 2. Hypothesis

146 For patients with ischemic stroke within 14 days of onset, XST can further improve the 90-day functional  
147 outcome.

## 148 3. Patients

### 149 3.1 Sample Size

150 A total of 3000 eligible patients will be enrolled.

### 151 3.2 Diagnostic Criteria



152 The diagnostic criteria for ischemic stroke are shown in Appendix 1 in detail.

### 153 3.3 Inclusion Criteria

- 154 1. Aged 18-75 years;
- 155 2. Clinical diagnosis of ischemic stroke within 14 days of symptom onset;
- 156 3. Pre-stroke modified Rankin Scale (mRS)  $\leq 1$ ;
- 157 4.  $4 \leq$  National Institutes of Health Stroke Scale (NIHSS) score  $\leq 15$ ;
- 158 5. Signed written informed consent.

### 159 3.4 Exclusion Criteria

- 160 1. Hemorrhage; or other pathologic brain disorders such as vascular malformations, tumors, abscesses,  
161 encephalitis; or other common non-ischemic brain diseases (e.g., multiple sclerosis) confirmed by head  
162 computed tomography (CT)/magnetic resonance imaging (MRI);
- 163 2. Had contraindications to panax notoginseng saponins:
  - 164 1) Known allergy history;
  - 165 2) Known allergy to agents including aspirin, salicylates, or any other ingredients of medicine included  
166 in the study;
  - 167 3) With a medical history of asthma caused by salicylates or substances containing salicylic acid, or non-  
168 steroidal anti-inflammatory drugs;
  - 169 4) Active peptic ulcers;
  - 170 5) Severe hepatic insufficiency or renal insufficiency  
171 (alanine aminotransferase  $> 2 \times$  upper limit of normal, or aspartate aminotransferase  $> 2 \times$  upper limit  
172 of normal; creatinine  $> 1.5 \times$  upper limit of normal);
  - 173 6) Severe cardiac failure;
  - 174 7) With a prior medical history of coagulopathy or systemic hemorrhages;
  - 175 8) With a prior medical history of thrombocytopenia or neutropenia;
  - 176 9) With a prior medical history of drug-induced blood system diseases or abnormal hepatic function;
  - 177 10) Leukopenia ( $< 2 \times 10^9/L$ ) or thrombocytopenia ( $< 100 \times 10^9/L$ );
  - 178 11) Female in the gestation or lactation period.
- 179 3. With indications for anticoagulation (suspected cardioembolism, such as atrial fibrillation, prosthetic heart  
180 valve, and suspected endocarditis);
- 181 4. With a medical history of intracranial hemorrhage or cerebral amyloid angiopathy;
- 182 5. With a medical history of aneurysm (including intracranial aneurysm and peripheral aneurysm);
- 183 6. Confirmed or suspected acute coronary syndrome;
- 184 7. High-risk bradyarrhythmia like sick sinus syndrome with second- or third-degree atrioventricular  
185 conduction block, bradycardia-related syncope induced by not installing a cardiac pacemaker;
- 186 8. With a history of gastrointestinal hemorrhage within 3 months prior to randomization, or undergoing a  
187 major surgery within 30 days prior to randomization;
- 188 9. Expected to receive endovascular treatment or operative treatment in the next 3 months;

- 189 10. Required to terminate the trial drug due to other scheduled surgery or interventional treatments;
- 190 11. Patients had severe non-cardiovascular or cerebrovascular diseases with a life expectancy of less than 3  
191 months;
- 192 12. Women of childbearing age showing negative pregnancy test but refusing to take effective contraceptive  
193 measures;
- 194 13. Currently receiving an investigational drug or being involved in a device experiment;
- 195 14. Participated in other drug clinical trials and received other Investigational Medicinal Products (IMPs)  
196 within 30 days before randomization;
- 197 15. Unable to understand and/or comply with the study procedures and/or follow-up due to psychiatric  
198 disorders, cognitive, or mental disorders;
- 199 16. Patients are not eligible for this clinical trial as evaluated by the investigator.

## 200 4. Outcomes

### 201 4.1 Primary Efficacy Outcome

202 Proportion of patients with functional independence ( $mRS \leq 2$ ) at 3 months after randomization.

### 203 4.2 Secondary Efficacy Outcomes

- 204 1. Proportion of recurrent stroke (ischemic stroke and intracerebral hemorrhage) at 3 months and 12 months  
205 after randomization;
- 206 2. Proportion of patients with functional independence ( $mRS \leq 2$ ) at 12 months after randomization;
- 207 3. Proportion of patients with no or minimal disability ( $mRS \leq 1$ ) at 3 months and 12 months after  
208 randomization;
- 209 4. Change in NIHSS score at 3 months after randomization;
- 210 5. Proportion of composite cerebrovascular events (ischemic stroke, intracerebral hemorrhage, myocardial  
211 infarction, and vascular death) at 3 months and 12 months after randomization;
- 212 6. Difference of EuroQoL Group 5-Dimension (EQ-5D) score at 3 months and 12 months after  
213 randomization;
- 214 7. Change in Barthel Index (BI) score at 3 months and 12 months after randomization;
- 215 8. Difference of platelet counts and coagulation indicators (prothrombin time, and activated partial  
216 thromboplastin time) at 3 months after randomization.

### 217 4.3 Primary Safety Outcome

218 Incidence of serious adverse events (SAEs) within 3 months of treatment.

### 219 4.4 Secondary Safety Outcomes

- 220 1. Incidence of symptomatic intracranial hemorrhage within 3 months of treatment;
- 221 2. Incidence of all-cause mortality within 3 months of treatment;
- 222 3. Incidence of AEs within 3 months of treatment.

## 223 5. Study Design

224 **5.1 Study Type**

225 A randomized, double-blind, placebo-controlled, multi-center trial.

226 **5.2 Randomization**

227 Eligible patients will be randomized into an XST group and a control group at a ratio of 1: 1 to receive XST  
228 or placebo.

229 ***XST group:***

230 XST, 60 mg/capsule, 120 mg per time, twice daily

231 ***Control group:***

232 XST placebo, 60 mg/capsule, 120 mg per time, twice daily

233 **6. Study Plan and Procedures**

234 Study period: From November 2017 to December 2021;

235 Duration of treatment: 3 months;

236 Study period for patients included in the trial: 12 months;

237 The endpoint of the whole trial is defined as the last visit of the last patient enrolled in the trial.

238 **6.1 Visit Schedule**

| Measures                               | Randomization/Day 1 | 1 month | 3 months | 6 months | 12 months |
|----------------------------------------|---------------------|---------|----------|----------|-----------|
| Demographic characteristics            | X                   |         |          |          |           |
| Presenting complaint                   | X                   |         |          |          |           |
| Physical examinations                  | X                   | X       | X        |          |           |
| mRS                                    | X                   | X       | X        | X        | X         |
| Past medical history                   | X                   |         |          |          |           |
| NIHSS                                  | X                   | X       | X        |          |           |
| Head CT/MRI                            | X                   |         |          |          |           |
| ASPECTS                                | X                   |         |          |          |           |
| Laboratory tests                       | X                   |         | X        |          |           |
| ECG                                    | X                   |         |          |          |           |
| Verifying inclusion/exclusion criteria | X                   |         |          |          |           |
| Signed written informed consent        | X                   |         |          |          |           |
| Randomization                          | X                   |         |          |          |           |

| Measures                | Randomization/Day 1 | 1 month | 3 months | 6 months | 12 months |
|-------------------------|---------------------|---------|----------|----------|-----------|
| Compliance              |                     | X       | X        |          |           |
| TOAST classification    | X                   |         |          |          |           |
| EQ-5D scale             | X                   | X       | X        | X        | X         |
| BI                      | X                   | X       | X        | X        | X         |
| Concomitant medications |                     | X       | X        | X        | X         |
| Capsule administration  | X                   | X       | X        |          |           |
| AEs/SAEs                |                     | X       | X        | X        | X         |

239 **6.1.1 Visit 1: Screening/Randomization Day (Day 1)**

- 240 • Signed written informed consent;
- 241 • Demographic characteristics;
- 242 • Relevant medical history and surgical history;
- 243 • Vital signs and physical examination;
- 244 • Head CT/MRI;
- 245 • Trial of Org 10172 in Acute Stroke Treatment classification;
- 246 • 12-lead electrocardiograph (ECG);
- 247 • Alberta Stroke Program Early CT Score, NIHSS, mRS, EQ-5D , and BI scores;
- 248 • Laboratory tests: hematology (including white blood cell count, neutrophil count, hemoglobin, and platelet  
249 count), urinalysis (including white blood cell, ketone bodies, and occult blood), coagulation (including  
250 prothrombin time, and activated partial thromboplastin time), hepatic and renal functions (including blood  
251 creatinine, and serum aminotransferase), electrolyte (including K<sup>+</sup>, and Na<sup>+</sup>), fasting serum glucose, and  
252 lipid (triglyceride, and total cholesterol);
- 253 • Current medications;
- 254 • Patients will be advised to start the corresponding treatment on the day when the patient meets the  
255 inclusion criteria. If the patient does not meet the inclusion criteria, the reason for the exclusion will be  
256 recorded in Patient Screening Records;
- 257 • Drug distribution.
- 258 The test results obtained at Visit 1 will be used as the baseline values;

259 **6.1.2 Visit 2: 1 Month after Randomization, Face-To-Face Follow-Up (Month 1 ± 3 days)**

- 260 • Vital signs and physical examination;
- 261 • NIHSS, mRS, EQ-5D, and BI scores;
- 262 • AEs and SAEs;
- 263 • Medication adherence;

- 264 • Current medications;
- 265 • Cardiovascular and cerebrovascular events: new strokes (ischemic stroke and intracerebral hemorrhage),  
266 and new composite cerebrovascular events (ischemic stroke, intracerebral hemorrhage, myocardial  
267 infarction, and vascular death).
- 268 **6.1.3 Visit 3: 3 Months after Randomization, Face-To-Face Follow-Up (Month 3 ± 7 days)**
- 269 • Vital signs and physical examination;
- 270 • NIHSS, mRS, EQ-5D, and BI scores;
- 271 • Laboratory tests: hematology (including white blood cell count, neutrophil count, hemoglobin, and platelet  
272 count), coagulation (prothrombin time and activated partial thromboplastin time), hepatic and renal  
273 functions (blood creatinine and serum aminotransferase);
- 274 • AEs and SAEs;
- 275 • Medication adherence;
- 276 • Current medications;
- 277 • Cardiovascular and cerebrovascular events: new strokes (ischemic stroke and intracerebral hemorrhage),  
278 and new composite cerebrovascular events (ischemic stroke, intracerebral hemorrhage, myocardial  
279 infarction, and vascular death).
- 280 **6.1.4 Visit 4: 6 Months after Randomization, Face-To-Face or Telephone Call Follow-Up (Month  
281 6 ± 7 days)**
- 282 • mRS, EQ-5D, and BI scores;
- 283 • AEs and SAEs;
- 284 • Current medications;
- 285 • Cardiovascular and cerebrovascular events: new strokes (ischemic stroke and intracerebral hemorrhage),  
286 and new composite cerebrovascular events (ischemic stroke, intracerebral hemorrhage, myocardial  
287 infarction, and vascular death).
- 288 **6.1.5 Visit 5: 12 Months after Randomization, Face-To-Face or Telephone Call Follow-Up (Month  
289 12 ± 7 days)**
- 290 • mRS, EQ-5D, and BI scores;
- 291 • AEs, SAEs, and endpoints;
- 292 • Current medications;
- 293 • Cardiovascular and cerebrovascular events: new strokes (ischemic stroke and intracerebral hemorrhage),  
294 and new composite cerebrovascular events (ischemic stroke, intracerebral hemorrhage, myocardial  
295 infarction, and vascular death).
- 296 **6.2 Protocol Compliance**
- 297 **6.2.1 Withdrawal Determined by the Investigator**
- 298 1. Patients undergoing allergic reactions or SAEs will withdraw from the study as judged by the physician;
- 299 2. The patient's symptoms worsened after medication, and in order to protect the patient, the patient was  
300 withdrawn from the study and received other effective treatment;
- 301 3. Patients experience some comorbidities, complications, or special physiological changes during the study,  
302 affecting the efficacy and safety evaluations;

- 303 4. Patients with poor compliance during the study, i.e., underdosing by less than 70% or overdosing by more  
304 than 130% of the required doses;
- 305 5. Patients who are midway breaking the blindness during the study for any reasons;
- 306 6. Patients who are considered not suitable to continue the study as judged by the investigator.

307 **6.2.2 Self-withdrawal by Participants**

308 The Informed Consent Form (ICF) provides that the patient is entitled to withdraw from the study, or the  
309 patient may also be lost to follow-up as no longer receive the drug or tests even though he/she has not clearly  
310 requested to withdraw (classified as withdrawal or dropout).

311 **6.2.3 Elimination Criteria**

312 Patients who should not have been enrolled or who have completed the study but violated some of the  
313 requirements of the protocol during the study will be eliminated as judged by investigators, including patients  
314 who:

- 315 1. Have not taken the drug;
- 316 2. Have no test records after drug administration;
- 317 3. With unavailable efficacy and safety evaluations due to the administration of a certain prohibited drug.

318 **7. Treatment**

319 **7.1 Identification of IMPs**

320 **7.1.1 IMPs**

321 Xuesaitong soft capsules; Specification: 0.33 g/capsule (60 mg panax notoginseng saponins per capsule);  
322 Dosage form: soft capsule;

323 Manufacturer: China Resources Kunming Shenghuo Pharmaceutical Co., Ltd.

324 Xuesaitong soft capsules placebo; Specification: 0.33g/capsule; Dosage form: soft capsule;

325 Manufacturer: China Resources Kunming Shenghuo Pharmaceutical Co., Ltd.

326 **7.1.2 Packaging of IMPs**

327 The drug products will be packed into a big box for each patient, i.e., Xuesaitong soft capsules/Xuesaitong  
328 soft capsules placebo. Each center will prepare adequate drugs. Each patient will be designated a randomization  
329 number corresponding to a certain box of drugs. The name of the IMPs, usage and dosage, storage conditions,  
330 production batch numbers, production date, and duration of use or expiry dates, as well as the notice "For  
331 clinical study use only" will be clearly marked on each package and label of drugs.

332 Each big box will contain a medium box and a small box, among which the small one will be used from day  
333 at randomization to 1 month after randomization, and the medium one is for 1 to 3 months after randomization.

334 A small box will include XST or XST placebo, with a specification of 0.33 g/capsule, 12 capsules/plate, and 2  
335 plates/box, with a total of 6 boxes.

336 A medium box will include XST or XST placebo, with a specification of 0.33 g/capsule, 12 capsules/plate,  
337 and 2 plates/box, with a total of 12 boxes.

338 **Labels for small boxes**

|                                                                                      |
|--------------------------------------------------------------------------------------|
| <b>Xuesaitong soft capsules for clinical study<br/>(For clinical study use only)</b> |
| Packaging: 6 boxes of Xuesaitong soft capsules or Xuesaitong soft capsules placebo   |

|                   |                                                                                             |
|-------------------|---------------------------------------------------------------------------------------------|
| Usage and dosage: | Oral, Xuesaitong soft capsules, 60 mg/capsule, 120 mg per time, twice daily                 |
| Storage:          | Stored in a cool place (not more than 20 °C) under shade and tightly closed                 |
| Batch no.:        | Xuesaitong soft capsules/placebo:                                                           |
| Production date:  | Xuesaitong soft capsules/placebo:                                                           |
| Expiration date:  | December 2021                                                                               |
| Note:             | Please consult doctors if you have any questions<br>Unused drugs will be uniformly recycled |
| Supplied by:      | China Resources Kunming Shenghuo Pharmaceutical Co., Ltd.                                   |

339

#### Labels for medium boxes

|                                                                                      |                                                                                               |
|--------------------------------------------------------------------------------------|-----------------------------------------------------------------------------------------------|
| <b>Xuesaitong soft capsules for clinical study<br/>(For clinical study use only)</b> |                                                                                               |
| Packaging:                                                                           | 12 boxes of Xuesaitong soft capsules or Xuesaitong soft capsules placebo                      |
| Usage and dosage:                                                                    | Oral, Xuesaitong soft capsules, 60 mg/capsule, 120 mg per time, twice daily                   |
| Storage:                                                                             | Stored in a cool place (not more than 20 °C) under shade and tightly closed                   |
| Batch no.:                                                                           | Xuesaitong soft capsules/placebo:                                                             |
| Production date:                                                                     | Xuesaitong soft capsules/placebo:                                                             |
| Expiration date:                                                                     | December 2021                                                                                 |
| Note:                                                                                | Please consult doctors if you have any questions.<br>Unused drugs will be uniformly recycled. |
| Supplied by:                                                                         | China Resources Kunming Shenghuo Pharmaceutical Co., Ltd.                                     |

340

#### Labels for big boxes

|                   |                                                                                               |
|-------------------|-----------------------------------------------------------------------------------------------|
| Packaging:        | 1 small box and 1 medium box                                                                  |
| Usage and dosage: | Oral, Xuesaitong soft capsules, 60 mg/capsule, 120 mg per time, twice daily                   |
| Storage:          | Stored in a cool place (not more than 20 °C) under shade and tightly closed                   |
| Batch no.:        | Xuesaitong soft capsules/placebo:                                                             |
| Production date:  | Xuesaitong soft capsules/placebo:                                                             |
| Expiration date:  | December 2021                                                                                 |
| Note:             | Please consult doctors if you have any questions.<br>Unused drugs will be uniformly recycled. |
| Supplied by:      | China Resources Kunming Shenghuo Pharmaceutical Co., Ltd.                                     |

341

### 7.2 IMP Records

342

The commissioning unit will provide all the investigational medicinal drugs, these drugs will be stored in a safe place under the required conditions, and be accessible only to the personnel involved in the study.

343

344

Investigators and/or pharmacists will maintain records of drug deliveries to the centers, list of delivered drugs, drug distributing and returning records, and records of unused drugs recalled, or other disposed by the commissioning unit. These records will include the date, quantity, batch number/serial number, expiration date (if any), IMPs, and unique number of the patient in the trial. Investigators will keep the records to confirm that patients have received the IMPs in accordance with the study protocol and all drugs from the commissioning unit have been used for the intended purpose. At the end of the trial, remaining drugs will be returned to the commissioning unit; investigators will ensure that patients returned all unused or remaining drugs, and investigators will not retain any of these drugs. The commissioning unit will count the remaining drugs after the trial and then eliminate them in accordance with relevant regulations in China, and send a copy of the elimination record to the principal investigator.

345

346

347

348

349

350

351

352

353

354

### 7.3 Storage of IMPs

355

All IMPs will be stored in safe place under appropriate conditions. Appropriate storage conditions are indicated on the IMP labels.

356

357

### 7.4 Concomitant Therapy

358

#### 7.4.1 Contraindicated Concomitant Medications, Food Products, and Health Care Products

359 During the study (including the oral administration period of XST/XST placebo), the use of traditional  
360 Chinese medicinal products, food products, and health care products, containing panax notoginseng, will be  
361 disallowed. Using the following drugs, food products and health care products containing panax notoginseng  
362 constitutes a violation of the protocol, the IMPs will be discontinued in such cases and the reasons will be  
363 recorded, but the visit at Month 3 will be completed.

364 Traditional Chinese medicinal products containing panax notoginseng include: Xueshuantong capsules,  
365 Xueshuantong injections, Panax notoginseng saponins tablets, Panax notoginseng saponins capsules, Compound  
366 Danshen dripping pills, Sanqi Shangyao tablets, Sanqitongshu capsules, Sanqi Xueshangning capsules, and  
367 Yanghuo Sanqi capsules.

#### 368 **7.4.2 Allowed Concomitant Medications and Therapy**

369 Medication will be administered by strictly following the "Chinese Guidelines for Diagnosis and Treatment of  
370 Acute Ischemic Stroke". In addition to the contraindicated concomitant drugs listed above, the use of other  
371 traditional Chinese medicinal products that stimulate blood circulation, remove stasis, and improve  
372 microcirculation will be avoided as much as possible; when necessary, no more than 2 of these drugs will be  
373 allowed. Other drugs can be selected reasonably for clinical use.

#### 374 **7.5 Treatment Compliance and Reliability**

375 XST/XST placebo will be prescribed by a doctor and administered by a dedicated employee to the patient for  
376 keeping. Dedicated employees will be responsible for managing the IMPs in the study center, including  
377 receiving, distributing, counting, and recycling. Investigators will ensure that IMPs are stored in a safe, separate,  
378 and locked place in the study center under the conditions meeting the storage requirements of the IMPs. No one  
379 will be allowed to access the drugs without the consent of the investigator. Empty packaging boxes will be  
380 stored and managed in the same way as the IMPs. The compliance of the patient will be evaluated by calculating  
381 the number of drugs returned at each follow-up. Usage of all drugs (including IMPs) will be recorded in the  
382 medical record and the corresponding position of the Case Report Form (CRF). Discontinuation dates of IMPs  
383 will be recorded. Concomitant medications will be recorded at each visit.

#### 384 **7.6 Discontinuation of IMPs**

385 IMPs will be administered as continuously as possible, but patients may discontinue the study treatment and  
386 evaluation at any time. When an IMP is discontinued, a decision for allowing temporary discontinuation is  
387 reached, if not, permanent discontinuation will be the last resort. Any drug discontinuation will be completely  
388 recorded on the corresponding page of the CRF. Patients will participate in the trial as long as possible under  
389 any circumstances. Pregnancy will lead to the permanent discontinuation of the trial under any circumstances.

##### 390 **7.6.1 Temporary Discontinuation of Study Treatment**

391 Medication of the IMPs will be resumed once the investigator believes that the IMP is likely unrelated to the  
392 event onset based on his/her best clinical judgment and there are no other contraindications against the  
393 continuation of the study. Resumed medications will be done under a close and reasonable monitoring.  
394 Suspension time of the study will be recorded in detail if it is determined that the study can be restarted.

##### 395 **7.6.2 Permanent Discontinuation of Study Treatment**

- 396 1. Decided by patients. Patients may terminate the treatment freely at any time without affecting their further  
397 treatment.
- 398 2. Decided by investigators. Including but not limited to the following:
  - 399 1) Mistaken enrollment that does not meet the Inclusion Criteria/Exclusion criteria, and will put the  
400 patient at a higher risk;
  - 401 2) AE is considered to be related to the study treatment and the investigator believes that continuing  
402 treatment may pose a higher risk;
  - 403 3) Poor compliance with the protocol;
  - 404 4) Pregnancy.



405 Discontinuation of IMPs does not mean discontinuation of follow-up or withdrawal from study. The study  
406 evaluation and telephone follow-up for all patients will be continued after the drug discontinuation.

### 407 **7.6.3 Procedure of IMP Discontinuation for Patients**

408 Patients who have permanently discontinued the IMPs will receive conventional therapies, and, if applicable,  
409 continue the regular visits as follows: Patients who have decided to discontinue the IMPs will be asked for  
410 reasons and whether they have experienced any AE. This information will be verified and recorded by  
411 investigators in the corresponding positions in the CRF. Information of all patients will be collected as much as  
412 possible during the whole study period, especially all the potential endpoint events. The complete withdrawal  
413 from study (withdrawal of the informed consent) may have a direct impact on the potential validity of the data,  
414 so it will be avoided as much as possible. Patients may continue to participate in the study according to the  
415 various following options if the patient has permanently discontinued the administration of the IMPs before the  
416 end of the study:

417 1. Patient agrees to participate in discontinuation visits and continues to attend visits in person.

418 This is the most ideal option, but the consent from the patients toward treatment discontinuation will be  
419 obtained before implementation. If the patient agrees, he/she will receive a premature treatment discontinuation  
420 visit (PTDV) on the day of discontinuation. After PTDV, the patient will also participate in the subsequent visits  
421 as scheduled, and data collection will be continued as per the protocol.

422 2. Patient refuses to attend visits in person but accepts to receive the follow-up by other means.

423 If the patient refuses to attend visits in person but accepts to receive the follow-up by other means, he/she will  
424 receive PTDV on the day of discontinuation. The subsequent visits before the end of the study will be conducted  
425 by other means (regular phone calls, and contact at the end of the study), which are applicable to patients who  
426 have not withdrawn the informed consent or withdrawn from the study.

427 3. Patient rejects follow-up by any means.

428 The patient rejects follow-up by any means, that is, the patient formally withdraws from the study and  
429 withdraws the informed consent. This decision will be recorded, and when the double-blind study period  
430 scheduled for such patients ends (3 months after the randomization), the survival status information of the  
431 patient will be collected via public channels pursuant to local laws. This plan will be avoided as much as  
432 possible.

### 433 **7.6.4 End of Treatment**

434 Three months after the randomization, IMP treatment will end, and the attending physician of the patient will  
435 determine the subsequent treatment regimens.

### 436 **7.6.5 End of Follow-up**

437 After the end of the study, patients will be required to receive the follow-up as scheduled. The investigator  
438 will complete the last visit while collecting the data of outcomes of efficacy and safety, AEs/SAEs, concomitant  
439 medications, mRS, EQ-5D, and BI scores.

### 440 **7.7 Withdrawal from the Study**

441 Without affecting their rights to acquire further treatment, patients will be allowed to withdraw from the study  
442 at any time, for example, by permanently discontinuing IMPs or withdrawing from the evaluation (withdrawal  
443 of informed consent). The investigator will certify the withdrawal of informed consent from this study and  
444 record it on the CRF and ICF. The ICF will, if possible, be re-signed with the signing date by the patient and the  
445 investigator. Any patient withdrawing from the study will be questioned about the reason for the withdrawal and  
446 inquired whether he/she has experienced any AE. The CRF will include the cause of the permanent  
447 discontinuation of the IMP treatment as well as the administration date of the last dose.

448 Patients who have permanently discontinued the IMPs will receive conventional therapies and will be  
449 expected to continue receiving the visits if applicable. One of the options "A" to "C" will be adopted if a patient  
450 declines all future follow-up visits of the study and formally withdraws the informed consent:

- 451 A. If possible, a patient receives a PTDV when the he/she discontinues the treatment and withdraws the  
452 informed consent of continued evaluation;
- 453 B. If the patient disagrees to option "A", which will be documented, a PTDV by other means (for example,  
454 via phone call) will be arranged and recorded in the CRF and ICF;
- 455 C. If the patient disagrees to both options "A" and "B", the disagreement will be recorded in the CRF and ICF.
- 456 It is crucial to collect as much information as possible during the study, especially survival statuses (death or  
457 survival), to ensure the validity of the study data. Therefore, at the end-of-treatment visit and end-of-study visit,  
458 investigators will make an effort to gather information on the survival statuses of all patients who have  
459 withdrawn their informed consent from public data sources. Patients who have withdrawn from the study will  
460 not be replaced.

## 461 8. Study Management

### 462 8.1 Enrollment and Randomization of Patients

463 Investigator will obtain the ICF signed by the patient or his/her legal representative before the randomization  
464 and certify the eligibility of the patient.

### 465 8.2 Randomization Procedures

466 For patients eligible for randomization, each center will assign randomization codes in strict sequential order.  
467 Randomization codes will be generated by SAS 9.4 (SAS Institute, Inc, Cary, NC) through block randomization  
468 to achieve balance in the allocation of patients between the two groups (1:1) as much as possible. The number of  
469 randomized patients planned in this study is approximately 3000.

470 At the Visit 1, the investigator will provide the randomization codes of patients to the dedicated drug-  
471 distributing employees in the sequence of patient enrollment, and the employees will identify the unique  
472 identification number on the drug box for drug supply at Visit 1. Patients will be required to complete the first  
473 administration of the IMPs within 24 hours after randomization.

### 474 8.3 Procedures of Mistakenly Included or Randomized Patients

475 By no means would a patient who violates the Inclusion Criteria/meets the Exclusion criteria be included in  
476 this study or randomized. This principle will be adhered to under any circumstances.

477 Patients will be treated by the following procedures if he/she violates the Inclusion Criteria/meets the  
478 Exclusion criteria but is already enrolled in this study:

- 479 1. The investigator or Clinical Research Associate (CRA) will immediately inform the physician of the study  
480 team and guarantee the safety of the patient as the priority;
- 481 2. The study treatment will be stopped if continued treatment may endanger the patients. The decision  
482 whether to discontinue the IMPs will be made after a discussion between the physicians and investigators  
483 of the study team. The reasons for discontinuing the treatment will be clearly recorded. The patient will  
484 receive follow-up visits according to the prescribed procedure until the end of the study, which is  
485 consistent with the intention-to-treat principle.
- 486 3. The reason for continuing the study will be clearly recorded if it is believed that the continued treatment  
487 will neither endanger the patient nor affect the therapy of the disease. The patient will keep receiving  
488 follow-up visits according to the prescribed procedure.

### 489 8.4 Blinding and Unblinding Procedures

#### 490 8.4.1 Methods to Ensure Blindness

491 To ensure the implementation of the blinding method, the personnel involved in randomization coding or who  
492 may know the codes, and the doctors or nurses involved in drug management will not participate in the selection

493 of patients, evaluation of efficacy and safety of drug to avoid bias. In addition, to ensure the blindness, the drug  
494 appearance, packages, and batch numbers in the two groups will be identical. Each box of drugs will be marked  
495 with a unique number. This number will be used to designate the treatment the patient receives, but will not  
496 inform the investigator or the patient about the treatment assignment. Data and Safety Monitoring Board  
497 (DSMB) will regularly review the efficacy and safety data, including the incidence of AEs and results of safety  
498 outcomes, to ensure the safety of patients. During the study, basic safety and efficacy data will be provided to  
499 the DSMB by an independent statistician.

#### 500 **8.4.2 Emergency Unblinding Method**

501 Emergency unblinding cards are available to investigators or pharmacists to obtain individual treatment  
502 codes, which represent the treatment that each randomized patient receives. For specific routine procedures,  
503 please refer to the operation manual provided to each study center. The code and randomization information will  
504 be disclosed only when the patient is in a medical emergency to ensure the patient will be treated appropriately.  
505 Investigators will report to the sponsor and the principal investigator of the leading institute before unblinding.  
506 If all blinding codes are leaked or the emergency unblinding rate exceeds 20%, the double-blind trial will be  
507 invalid.

#### 508 **8.5 Blind Review**

509 After the blindness is reviewed and the established database is confirmed correct, the principal investigator  
510 and the statistical analysts will lock the data. The locked data file will not be changed.

### 511 **9. Quality Control (QC)**

512 During the clinical trial, the CRA will regularly visit the study center for monitoring to ensure the protocol is  
513 implemented compliantly, and review the source data to ensure the consistency with the data on CRF.  
514 Employees involved in the clinical trial will receive uniform training.

515 Investigators will prudently fill in each item of the CRF as required with accurate and detailed information to  
516 ensure the accuracy and reliability of the CRF data. All the observation results and findings in the clinical trial  
517 will be verified to ensure data reliability and that the conclusions of the clinical trial are completely based on  
518 source data.

#### 519 **9.1 Storage and Auditing of Source Data/Documents**

520 The source documents represent the basis for the real existence of the patients and the reliability of the  
521 collected data, and will be kept in each study center. The data in the CRF is from source documents and will be  
522 consistent with source documents; if not, any deviation will be explained. The following items recorded in the  
523 CRF will come from source documents:

- 524 • Basic information of patients (name abbreviation, gender, birthday, height, and weight);
- 525 • Date of patients participating in the trial;
- 526 • Follow-up dates of patients;
- 527 • Medical history (concomitant diseases, start and end date, and changes);
- 528 • Medication history (concomitant therapies and medications, start and end dates, and changes);
- 529 • AEs (onset and end dates, and changes);
- 530 • SAEs (onset and end dates, and changes);
- 531 • Laboratory test results;
- 532 • ECG results and the test results by other medical instruments.

533 All other information will be directly recorded in the CRF and treated as source data. Investigators will accept

534 the sponsor's monitoring and auditing, ethics committee's review, and relevant regulatory authorities'  
535 inspections, and allow the employees from the above parties to refer to all the source data/documents. All source  
536 data, including the copies of the results of laboratory tests and other medical tests, will always be ready for the  
537 review of the CRA designated by the sponsor and the CFDA (now NMPA). The CRA will check all CRF and  
538 ICF and verify the accuracy of the data in these documents.

### 539 **9.2 Pre-study Task**

540 Before the first patient is enrolled, the sponsor's representative will visit the study center to:

- 541 1. Confirm whether the study center's facilities are adequate;
- 542 2. Confirm whether there are suitable patients to be enrolled in the study center;
- 543 3. Discuss with investigators (and other study-related personnel) their responsibilities for the protocol and the  
544 responsibilities of the sponsor or its representative.

### 545 **9.3 Training of Study Center Personnel**

546 Before the first patient is enrolled in the study, the undertaking unit will provide standardized trainings and  
547 examinations to the principal investigator and all other investigators of the sub-center, and the study will only be  
548 started in the sub-center once the examinations are passed. The principal investigator will make sure that all  
549 study-related personnel are trained properly for the study with complete training records.

### 550 **9.4 Study Monitoring**

551 During the study, the sponsor will contact the study centers regularly, including:

- 552 1. Visits to provide information and support to the investigators;
- 553 2. Confirm that the facility still meets the requirements;
- 554 3. Confirm whether all study-related personnel follow the protocol, the data is recorded in the CRF promptly  
555 and accurately, and numbers of the IMPs are checked;
- 556 4. Compare the data in the CRF with the records of the patients generated in the study centers, including the  
557 inspection on ICF of the patient. All original records of each patient will be directly examined.

558 Investigators will contact the sponsor during the follow-up intervals for information and recommendations  
559 related to the study.

### 560 **9.5 Source Data**

561 The undertaking unit will store all original records and source data, which will be inspected and reviewed by  
562 the CFDA (now NMPA).

### 563 **9.6 Study Progress**

564 If the procedures at a study center are not conducted in accordance with Good Clinical Practice (GCP)  
565 requirements, or if the recruitment period is too long, the study at that center may be terminated. The study  
566 sponsor may terminate the study early due to safety concerns about the study.

## 567 **10. AEs**

568 Any information on AEs, whether mentioned by patients and found by investigators, or detected in physical  
569 examinations, laboratory tests, or by other means, will be recorded in the AE pages of the CRF, and these AEs  
570 will be treated and reported pursuant to related laws.

### 571 **10.1 Definition of AEs**

572 Any adverse medical events, or worsening of pre-existing medical events from the start of the randomization

573 to the last visit, whether or not causally related to the IMPs, are regarded as AEs. During the clinical study, any  
574 unexpected events that happen to the patients will be defined as AEs. Adverse medical events include clinical  
575 symptoms (such as nausea and chest pain), signs (such as tachycardia and hepatomegaly), and abnormal test  
576 results (including laboratory tests and ECG). The physicians will report all AEs directly observed by themselves  
577 or spontaneously reported by the patients concisely with medical terminology. Adverse drug reactions are the  
578 reactions that are directly or indirectly related to drugs. To prevent any omission of adverse drug reactions when  
579 the relationship between an AE and drugs can hardly be determined, all AEs will be recorded in the CRF,  
580 including occurrence time, severity, duration, treatment measures, and outcome. Additionally, all relationships  
581 between AE and drugs will each be stated.

## 582 **10.2 Observation and Records of AEs**

583 All patients who have received at least 1 dose of the IMPs will undergo a safety evaluation with the following  
584 events recorded: AEs, SAEs, deaths, recurrent strokes, drug discontinuation for any reasons, abnormal  
585 laboratory test results, vital sign changes, and changes to physical examination results. Any AE that happens  
586 from the start of the randomization to 12 months after the enrollment or the last visit will be recorded. A patient  
587 with an AE will be followed up until the event disappears, restored to the baseline level, or becomes clinically  
588 insignificant. All AEs occurring during the study will be recorded in the CRF. The evaluation will include the  
589 name of AE, severity, outcome, relationship between AEs and IMPs, and treatment measures.

## 590 **10.3 Severity of AEs**

- 591 1. Mild: mild symptoms or diseases that improve rapidly after drug discontinuation and require no treatment;
- 592 2. Moderate: transient damages that do not require hospitalization or prolonged hospitalization but do require  
593 treatment or interventions, and can be easily relieved;
- 594 3. Severe: transient damages that require an out-patient to be hospitalized or an in-patient to prolong the  
595 hospitalization by more than 7 days, or permanent damages to systems/organs, or life-threatening events  
596 (asphyxia, shock, coma, and other symptoms that require first aid treatment).

## 597 **10.4 Correlation between the AE and Drugs**

598 Investigators will evaluate the correlation between AEs and the IMPs as well as concomitant medications:

- 599 1. Definitely related: the onset time follows the time sequence after administration, and the AE is consistent  
600 with a known type of adverse reactions of the suspected drug; the adverse reaction improves or disappears  
601 after the dose reduction or drug discontinuation but reappears after resuming the drug administration;
- 602 2. Probably related: the onset time follows the time sequence after administration, and the AE is consistent  
603 with a known type of adverse reactions of the suspected drug; the adverse reaction improves or disappears  
604 after the dose reduction or drug discontinuation but it may also be caused by the clinical status of the  
605 patient or other reasons;
- 606 3. Possibly related: the onset time follows the time sequence after administration, and the AE is consistent  
607 with a known type of adverse reactions of the suspected drug; the adverse reaction improves or disappears  
608 after the dose reduction or drug discontinuation but it can be explained by the clinical status of the patient  
609 or other reasons;
- 610 4. Unlikely related: the onset time is unlikely to follow the time sequence after administration, and the AE is  
611 hardly consistent with a known type of adverse reactions of the suspected drug; the adverse reaction is  
612 possibly caused by the clinical status of the patient or other reasons;
- 613 5. Definitely unrelated: the onset time does not follow the time sequence after administration, and the AE is  
614 hardly consistent with a known type of adverse reactions of the suspected drug; the reaction can be  
615 explained by the clinical status or other reasons of the patient and it improves or disappears after removing  
616 the clinical status or other reasons;
- 617 6. Unknown.

618 Summarize the AEs of the first three criteria in each CRF and calculate the incidence of drug-related AEs.

619 **10.5 SAEs**

620 SAEs are defined as the AEs leading to following results:

- 621 1. Death;
- 622 2. Life-threatening (the AE occurrence leads to a life-threatening risk to the patient, excluding the AEs that  
623 are assumed to be potential causes of deaths if worsened) event;
- 624 3. Hospitalization or prolonged hospital stay;
- 625 4. Continuous or significant disability/dysfunction;
- 626 5. Congenital malformations or birth defects;
- 627 6. Medical events considered as SAEs by the investigator.

628 In case of a SAE during the trial, whether related to the IMPs or not, the investigator will immediately take  
629 treatment measures for the patient for their safety and will report it to the CRA, the ethics committee of the  
630 center, and the undertaking unit within the 24 h after it occurs. The undertaking unit will report it to ethics  
631 committees and the sponsor, as well as the CFDA (now NMPA) for filing. The investigator will complete the  
632 filling of the SAE form.

633 In case of a SAE that has not been resolved after the end of the trial or the early withdrawal of the patient will  
634 be followed up until any of the following circumstances:

- 635 1. Event disappears or is resolved;
- 636 2. Stable event;
- 637 3. Event is restored to baseline;
- 638 4. Event is relieved to be clinically insignificant;
- 639 5. Event can be attributed to the drugs other than the IMPs or factors unrelated to the study, or that any more  
640 information is unlikely to be obtained (the patients or medical staff refuse to provide more information, or  
641 there is evidence that the patient is still lost to follow-up despite best efforts).

642 **10.6 Record, Management, and Report**

- 643 • Any AEs during the trial, whether related to the IMPs or not, will be documented;
- 644 • AEs related to IMPs will be managed carefully;
- 645 • Patients will be required to report any changes after the drug administration;
- 646 • Investigators will avoid asking inductive questions. While observing the efficacy, the patient will be  
647 closely monitored for AEs and unexpected toxic or side effects (including symptoms, signs, and laboratory  
648 test results), which will be analyzed for reasons, judged, followed up, and recorded;
- 649 • Incidence of AEs will be calculated;
- 650 • Symptoms, severity, occurrence time, duration, treatment measures, outcomes, correlation to drugs, and  
651 follow-up modes of the AEs during the trial will be recorded in CRF in detail, and the CRF will be signed  
652 and dated;
- 653 • When an AE is found, investigator may decide whether to discontinue the study according to the patient's  
654 condition, and will carry out a follow-up investigation on the case of drug discontinuation due to AEs and  
655 record the process and results in detail;
- 656 • In case of any SAE or important AE occurring during the study, the investigator will initiate emergency  
657 procedures;

- 658 • Among all patients who have received the study treatment, those experiencing AEs will be included in AE  
659 statistics, regardless of whether they have completed the whole trial.

## 660 **10.7 Emergency Procedures**

661 In case of any SAE or important AE occurring during the study, the investigator will immediately organize a  
662 rescue for the patient to ensure his/her safety. The undertaking unit will be informed of the event immediately  
663 via telephone/fax, to clarify whether or not the event is IMP related or if the IMP has been administered.  
664 Subsequently, the CRA will provide a written report to describe the details and outcome of the event. In addition  
665 to confirmation of the content reported by telephone/fax, the written report will also contain other unmentioned  
666 information. The CRA will check the written report and report to the drug safety department according to GCP  
667 standard operating procedures within 24 h or no later than the second working day after receiving the phone call.

## 668 **11. Ethical and Regulatory Requirements**

### 669 **11.1 Independent Ethics Committee Approval**

670 According to the local regulations, all protocols (and relevant amendments, if any), including patient  
671 information and informed consent, will obtain the approval of independent ethics committee before  
672 implementation. The reports related to the progress of trial, including notification of matters regarding the  
673 completion or termination of trial, will be submitted to the independent ethics committee by the investigator or  
674 sponsor.

### 675 **11.2 Patient Information and Informed Consent**

676 These documents will be created according to International Conference on Harmonization-Good Clinical  
677 Practice guidelines, and will be provided to the independent ethics committee as separate documents. Only  
678 approved versions will be used for the trial. During the process to obtain and record informed consent, the  
679 investigator will comply with relevant local regulatory requirements and the Declaration of Helsinki. Prior to  
680 initiation of activities related to the study, investigator will verbally describe the information on this study to the  
681 patients, and provide relevant written information that is readable and understandable for the patients. The ICFs  
682 signed and dated voluntarily by each patient will be obtained. The written ICF will be signed and dated by the  
683 personnel who is responsible for the implementation of informed consent procedures. The patients enrolled in  
684 the study will be informed that they can refuse to participate in the study and their medical care will not be  
685 affected. Information on their medical conditions will be collected and recorded, and all findings will be handled  
686 in strict confidence. Patients will be provided with the copies of patient information and ICF.

### 687 **11.3 Essential Documents**

- 688 1. Latest curriculum vitae of the principal investigator;
- 689 2. Investigator signature page in the protocol;
- 690 3. Copies of dated documents related to the protocol and local investigators that have been approved by the  
691 independent ethics committee, including any amendments, patient information and ICF, compensation (if  
692 any), and any other documents that have been submitted;
- 693 4. Contracts signed between the sponsor and the study centers;
- 694 5. Approval documents from the local hospital management authority if necessary;
- 695 6. Other relevant documents that are required before the initiation of study.

## 696 **12. Data Management**

### 697 **12.1 Data Acquisition and CRF**

698 CRFs will be filled in by the investigator and will be completed for each enrolled patient. An electronic data

699 capture system will be used for data acquisition for all CRFs. All data will be reviewed and submitted by the  
700 CRA to the data administrator for data management.

## 701 **12.2 Data Management Procedures and Tasks**

### 702 **12.2.1 Design of CRF and Database**

703 The design of CRF will ensure that the collection of all data meets the requirements for statistical analysis as  
704 specified in the protocol. Guidelines for completing the corresponding CRFs will be established. Logical  
705 verification will be established according to the design description of database, and the database will be put into  
706 use after passing the user acceptance testing.

### 707 **12.2.2 Receipt of Data**

708 Data collection and management of this study will follow the requirements of GCP. The data administrator  
709 designated by the statistics agency will be responsible for data acquisition and management. The data  
710 administrator will compile a program for data acquisition and management. The clinical investigator or clinical  
711 research coordinator will fill in the CRFs in an accurate, timely, complete, and standardized manner according to  
712 the CRF guidance. Instructions for data acquisition will be formulated before data acquisition to determine  
713 relevant requirements and methods. For any question about the CRF, the data administrator will create a data  
714 rating questionnaire, and send a query to the investigator through the CRA. The investigator will give a reply as  
715 soon as possible, and the data administrator will modify and confirm the data according to the investigator's  
716 reply, or send another questionnaire when necessary.

### 717 **12.2.3 Data Validation and Query**

718 The data administrator, CRA, medical personnel, and statistician will perform data validation according to the  
719 content, method, and validation requirements as stated in the data validation plan.

### 720 **12.2.4 Medical Coding**

721 The coding standards, procedures, and dictionary will be established to match the descriptions of AE,  
722 diagnosis, concomitant medications, previous medications, and past medical history collected from the CRF  
723 using International Classification of Diseases-10 and WHO Anatomical Therapeutic Classification.

### 724 **12.2.5 Database Locking, Unlocking, and Re-locking**

725 Formulate the responsible person and standard operating procedures to be executed for database lock, and  
726 specify the conditions and procedures for unlocking and re-locking the database after locking.

### 727 **12.2.6 Data Export and Transfer**

728 Describe the file formats for data export and transfer, export content (database, variable name, and variable  
729 value code), submission procedures, and transmission medium. The transmission medium will conform to  
730 national regulations and regulatory requirements.

### 731 **12.2.7 Archiving Requirements for Data and Data Management Documents**

732 Data and the time of their input/import into the database, recorders, data audit trail, and documents generated  
733 during data management will all be kept intact. Data generated during data management typically include, but is  
734 not limited to: clinical study data, external data, database metadata, reference value range for laboratory tests,  
735 change control list of logical verification and derived data, data query form, and procedure code. Documents  
736 generated during data management typically include, but are not limited to: data management plan, blank CRF,  
737 CRF completion guidance, completed CRF in portable document format, annotated CRF, database design  
738 description, instructions for data entry into the database, data validation plan, data QC, and validation reports.

## 739 **12.3 Data Quality Management**

740 The data management plan will determine the QC items, QC methods (e.g., QC frequency, sample selection  
741 method, and sample size), quality requirements and specifications, and remedial measures for failure to meet the  
742 expected specifications during data operation and management.



743 **13. Statistical Analysis and Sample Size**

744 All statistical analyses will be carried out using the SAS 9.4 (SAS Institute, Inc, Cary, NC) software  
745 according to the predetermined statistical analysis plan. Comparisons between two groups are performed using a  
746 two-side test ( $\alpha = 0.05$ ). A difference of  $p \leq 0.05$  is considered to be statistically significant.

747 **13.1 Analysis Cohorts**

748 **13.1.1 Modified Intention-To-Treat Cohort**

749 According to the basic principle of intention-to-treat analysis, all patients after randomization who received at  
750 least one record for drug administration and efficacy evaluation will be included in the modified intention-to-  
751 treat cohort. During analysis with the modified intention-to-treat cohort, missing values will be estimated using  
752 the last observation carried forward method. The modified intention-to-treat population will be the primary  
753 population for efficacy evaluation in this study.

754 **13.1.2 Per-Protocol Cohort**

755 Per-protocol cohort will include all patients who have completed the treatment prescribed in the protocol or  
756 those without major violations of the trial protocol. The exact definition of major protocol violation will be  
757 finalized during data review, generally including, but not limited to the following conditions: failure to meet the  
758 primary inclusion criteria, treatment that seriously interferes with efficacy evaluation after enrollment, poor  
759 compliance, and follow-up that seriously exceeds the time window. Per-protocol population will be the  
760 secondary population for efficacy evaluation.

761 **13.1.3 Safety Cohort**

762 Safety cohort is defined as a collection of all patients who have received at least one dose of drug treatment.

763 **13.2 Statistical Analysis Methods**

764 **13.2.1 Baseline Between-Group Comparisons**

765 Wilcoxon rank-sum test will be used for measurement data. Chi-square test will be used for the comparability  
766 of enumeration data between the two groups.

767 **13.2.2 Efficacy Analysis**

768 Primary endpoint: According to the basic principle of intention-to-treat analysis, Chi-square test or Fisher's  
769 exact test will be used for data in the modified intention-to-treat cohort to evaluate efficacy. In addition, a  
770 logistic regression model will be adopted to calculate the odds ratio (OR) between the two treatment regimens,  
771 with center effects set as random effects in the model.

772 Secondary endpoint: The primary endpoint analysis strategy will be used for most secondary endpoint  
773 analyses. Wilcoxon rank-sum test will be used for measurement data to analyze differences between the two  
774 groups. For survival data, the Kaplan-Meier method will be used to estimate the survival rate of each group and  
775 plot survival curves, log-rank test will be used for efficacy evaluation, and Cox proportional hazards model will  
776 be used to calculate the hazard ratio (HR) between the two treatment regimens. For non-survival data, Chi-  
777 square test or Fisher's exact test will be used, and a logistic regression model will be used to calculate the OR  
778 value. Center effects will be set as random effects in all the models.

779 **13.2.3 Safety Analysis**

780 AEs and SAEs that have occurred will be listed separately and pooled for analysis. In each treatment group,  
781 the number and proportion of cases experiencing AEs will be pooled by system classification and items of  
782 interest. In addition, all deaths and SAEs will be described in detail in case narratives.

783 **13.2.4 Interim Analysis**

784 No interim analysis will be conducted in this study.

785 **13.2.5 End-of-Study Follow-Up**

786 Data collected from each group at the end of the study visit will be reported using descriptive statistics. The  
 787 modified intention-to-treat cohort will be used for the analysis of efficacy outcomes, and the safety cohort will  
 788 be used for the analysis of AEs.

789 **13.3 Sample Size Determination**

790 Based on previous findings, assuming that the proportion of patients in the control group with mRS  $\leq 2$  at 3  
 791 months is 45%, and the proportion in the XST group is relatively increased by 12%, with the significant level of  
 792 0.05 and the power of 0.80, 1342 patients are required in each group, and considering 10% lost to follow-up,  
 793 1492 patients are required in each group. Rounded to an integer, this trial is expected to enroll 3000 patients.

| <b>Power</b> | <b>Sample size<br/>of the XST<br/>group</b> | <b>Sample size<br/>of the control<br/>group</b> | <b>Response<br/>rate of IMP</b> | <b>Response rate<br/>of control<br/>drug</b> | <b>Difference in<br/>response rate<br/>between the two<br/>groups</b> | <b>Significant<br/>level</b> |
|--------------|---------------------------------------------|-------------------------------------------------|---------------------------------|----------------------------------------------|-----------------------------------------------------------------------|------------------------------|
| 0.8000       | 2389                                        | 2389                                            | 0.4400                          | 0.4000                                       | 1.100                                                                 | 0.0500                       |
| 0.8000       | 1931                                        | 1931                                            | 0.4950                          | 0.4500                                       | 1.100                                                                 | 0.0500                       |
| 0.8001       | 1565                                        | 1565                                            | 0.5500                          | 0.5000                                       | 1.100                                                                 | 0.0500                       |
| 0.8001       | 1977                                        | 1977                                            | 0.4440                          | 0.4000                                       | 1.110                                                                 | 0.0500                       |
| 0.8002       | 1597                                        | 1597                                            | 0.4995                          | 0.4500                                       | 1.110                                                                 | 0.0500                       |
| 0.8002       | 1293                                        | 1293                                            | 0.5550                          | 0.5000                                       | 1.110                                                                 | 0.0500                       |
| 0.8001       | 1663                                        | 1663                                            | 0.4480                          | 0.4000                                       | 1.120                                                                 | 0.0500                       |
| 0.8001       | 1342                                        | 1342                                            | 0.5040                          | 0.4500                                       | 1.120                                                                 | 0.0500                       |
| 0.8004       | 1086                                        | 1086                                            | 0.5600                          | 0.5000                                       | 1.120                                                                 | 0.0500                       |
| 0.8002       | 1419                                        | 1419                                            | 0.4520                          | 0.4000                                       | 1.130                                                                 | 0.0500                       |
| 0.8001       | 1144                                        | 1144                                            | 0.5085                          | 0.4500                                       | 1.130                                                                 | 0.0500                       |
| 0.8001       | 924                                         | 924                                             | 0.5650                          | 0.5000                                       | 1.130                                                                 | 0.0500                       |
| 0.8002       | 1225                                        | 1225                                            | 0.4560                          | 0.4000                                       | 1.140                                                                 | 0.0500                       |
| 0.8003       | 987                                         | 987                                             | 0.5130                          | 0.4500                                       | 1.140                                                                 | 0.0500                       |
| 0.8001       | 796                                         | 796                                             | 0.5700                          | 0.5000                                       | 1.140                                                                 | 0.0500                       |
| 0.8002       | 1068                                        | 1068                                            | 0.4600                          | 0.4000                                       | 1.150                                                                 | 0.0500                       |
| 0.8003       | 860                                         | 860                                             | 0.5175                          | 0.4500                                       | 1.150                                                                 | 0.0500                       |
| 0.8002       | 693                                         | 693                                             | 0.5750                          | 0.5000                                       | 1.150                                                                 | 0.0500                       |

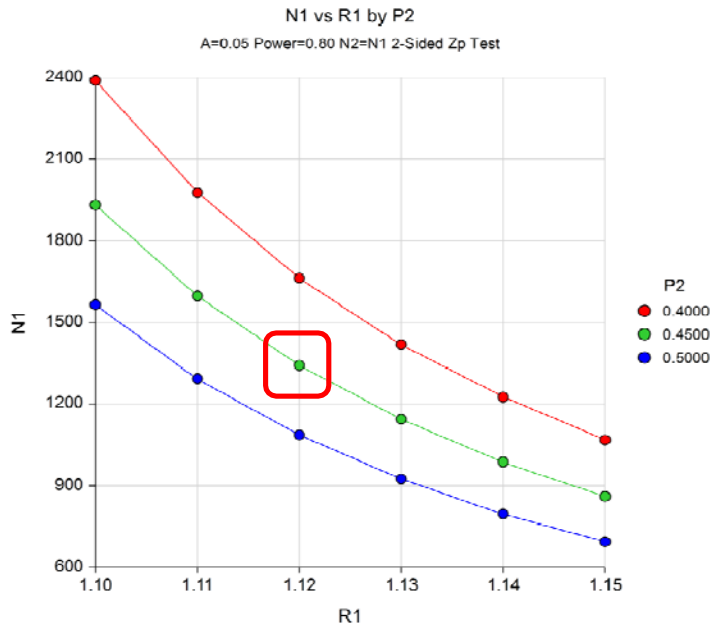

794

795 **14. Principles for Protocol Amendment**

796 All amendments to the protocol will be signed by all the signatories of the original protocol and recorded.

797 **15. Principles and Criteria for Complete Termination of the Trial**

- 798 • Serious safety issues occur;
- 799 • The drug is found to have a poor response or is even ineffective without any value;
- 800 • Major errors are found in the study protocol or major deviations occur during the implementation of the
- 801 protocol, making it difficult to evaluate the drug effect;
- 802 • Discontinuation requested by the sponsor (due to cost or management issues);
- 803 • Authorization for the trial is revoked by the administrative authority.

804 **16. Confidentiality**

805 Personal medical information of patients obtained during the trial will be considered confidential and will not  
806 be disclosed to any third party except in the following circumstances:

- 807 1. Related medical information may be provided to the patient's physician in charge, or to other relevant  
808 physicians;
- 809 2. Data related to this trial may be provided to the following personnel and agencies for review, including  
810 participating physicians, sponsor's representative, ethics committees, and relevant regulatory authorities.

811 Further protection will be provided to patients via patient's identification code.

## 812 17. References

- 813 [1] Lozano R, Naghavi M, Foreman K, et al. Global and regional mortality from 235 causes of death for 20  
814 age groups in 1990 and 2010: a systematic analysis for the Global Burden of Disease Study 2010 [J].  
815 *Lancet*, 2012, 380(9859):2095-2128.
- 816 [2] Yang G, Wang Y, Zeng Y, et al. Rapid health transition in China, 1990-2010: findings from the Global  
817 Burden of Disease Study 2010 [J]. *Lancet*, 2013, 381(9882):1987-2015.
- 818 [3] Li Hao, Sun Honghui. Clinical Observation of Xuesaitong Injection in the Treatment of Intracerebral  
819 Hemorrhage [J]. *Chinese Journal of Integrated Traditional and Western Medicine in Intensive and Critical*  
820 *Care*, 2004, 11(1):50-52. [In Chinese]
- 821 [4] Liu Jianhui, Ji Fengyun, Wang Ting, et al. Experimental Study on the Protective Effects of Panax  
822 Notoginseng Saponins on Cerebral Ischemia-Reperfusion Injury [J]. *Chinese Journal of Clinical*  
823 *Neurosciences*, 2002, 10(1):90. [In Chinese]
- 824 [5] Cao Baowen, Du Yuebin. Effects of Panax Notoginseng Saponins on Hemorheology of Ischemic  
825 Cerebrovascular Diseases [J]. *People's Military Surgeon*, 2003, 46(12):695-697. [In Chinese]
- 826 [6] Li Shaoyan, Hu Jinmei, Zhang Shuning. Clinical Observation on the Safety and Effectiveness of  
827 Xuesaitong Soft Capsules in the Treatment of Convalescent Cerebral Infarction Involving Meridian and  
828 Collateral [J]. *Hebei Medical Journal*, 2010, 32(5):560-561. [In Chinese]
- 829 [7] Gao Linrong, Lan Hua. Xuesaitong Soft Capsules for the Treatment of 45 Cases of Convalescent Ischemic  
830 Stroke [J]. *Chinese Medicine Modern Distance Education of China*, 2012, 10(7):32-33. [In Chinese]
- 831 [8] Xie Xudong, Ji Fengyun, Wang Ting, et al. Efficacy Observation of Panax Notoginseng Saponins in the  
832 Treatment of 586 Cases of Acute Cerebral Infarction [J]. *Hebei Medical Journal*, 2001, 23(2):108-109. [In  
833 Chinese]
- 834 [9] Guo Ziqing, Liu Sixin, Chen Xuelian, et al. Efficacy Observation of Xuesaitong Soft Capsules in  
835 Combination with Ozagrel Sodium in the Treatment of 112 Cases of Acute Cerebral Infarction [J]. *China*  
836 *Practical Medicine*, 2011, 06(3):162-163. [In Chinese]
- 837 [10] Liu Yuanhong, Ge Xiaohang, Liang Jinhua, et al. Efficacy Observation of Xuesaitong Soft Capsules in the  
838 Treatment of 100 Cases of Acute Cerebral Infarction [J]. *Yunnan Journal of Traditional Chinese Medicine*  
839 *and Materia Medica*, 2005, 26(4):51. [In Chinese]
- 840 [11] Gao Na. Discussion on the Clinical Effects of Atorvastatin in Combination with Xuesaitong Soft Capsules  
841 on the Carotid Plaque Stability and Blood Lipid Level in Patients with Cerebral Infarction [J]. *Chinese*  
842 *Journal of Practical Nervous Diseases*, 2017, 20(6):93-95. [In Chinese]
- 843 [12] Tian Z, Pang H, Du S, et al. Effect of Panax notoginseng saponins on the pharmacokinetics of aspirin in  
844 rats [J]. *Journal of Chromatography B Analytical Technologies in the Biomedical & Life Sciences*, 2017,  
845 1040:136-143.
- 846 [13] Gui Shuhua, Hu Lingling, Wang Tinggang, et al. Effects of Xuesaitong Soft Capsules in Combination with  
847 Aspirin on Carotid Plaque Stability and Body Antioxidant Function in the Treatment of Chronic Cerebral  
848 Infarction in the Elderly [J]. *Guizhou Medical Journal*, 2017, 10:1059-1061. [In Chinese]



850 **Appendix 1. Diagnostic Criteria for Ischemic Stroke (Excerpts)**

851 Diagnosis of ischemic stroke will be made according to the criteria set in the Fourth National Cerebrovascular  
852 Disease Conference of the Chinese Medical Association.

853 **1. Atherosclerotic thrombotic cerebral infarction**

- 854 1) Usually occurring at rest;
- 855 2) Mostly without obvious headache or vomiting;
- 856 3) Slow onset, typically progressive or periodic, usually related to cerebral atherosclerosis, and also seen in  
857 arteritis and hematological diseases;
- 858 4) Clear consciousness or mild disorder of consciousness generally 1-2 days after the onset;
- 859 5) Symptoms and signs of internal carotid artery system and/or vertebrobasilar system;
- 860 6) CT or MRI examination is required;
- 861 7) Lumbar puncture cerebrospinal fluid will normally contain no blood.

862 **2. Cerebral embolism**

- 863 1) Most cases have a sudden onset;
- 864 2) Most show no prodromal symptoms;
- 865 3) Clear consciousness or transient disorder of consciousness in general;
- 866 4) Symptoms and signs of internal carotid artery system and/or vertebrobasilar system;
- 867 5) Lumbar puncture cerebrospinal fluid will normally contain no blood, and hemorrhagic cerebral infarction  
868 may be considered if red blood cell is present;
- 869 6) Emboli can be classified into cardiogenic and non-cardiogenic emboli by source, and can be accompanied  
870 by embolism symptoms in other organs, skin, and mucous membranes.

871 **3. Lacunar infarction**

- 872 1) The disease is mostly due to arteriosclerosis in hypertension patients, characterized by acute or subacute  
873 onset;
- 874 2) Most cases have no disorders of consciousness;
- 875 3) CT or MRI examination is required to for clear diagnosis;
- 876 4) Clinical manifestations are not serious, commonly including pure sensory stroke, pure motor hemiplegia,  
877 ataxic hemiparesis, dysarthria-clumsy hand syndrome, or sensorimotor stroke;
- 878 5) Lumbar puncture cerebrospinal fluid will contain no red blood cells.

879 **4. Asymptomatic infarction**

880 This is a vascular disorder confirmed only by imaging for which no brain or retinal symptoms is documented,  
881 and the clinical diagnosis will be decided depending on the specific situation.

882

883 **Appendix 2. The modified Rankin Scale**

884 The mRS will be used to assess patients' functional outcome after stroke. Only symptoms developing after the  
 885 stroke will be considered. If a patient is able to walk with the support of some assistive devices and requires no  
 886 external assistance, then the patient will be considered able to walk independently. If two grades seem equally  
 887 applicable to the patient, and further questions are unlikely to help make an absolutely correct choice, the more  
 888 serious grade will be chosen.

|     |                                                                                                                       |
|-----|-----------------------------------------------------------------------------------------------------------------------|
| 889 | <b>0-No symptoms at all</b>                                                                                           |
| 890 | Despite possible mild symptoms, the patient does not experience any new functional limitations or symptoms            |
| 891 | since the occurrence of stroke.                                                                                       |
| 892 | <b>1-No significant disability despite symptoms; able to carry out all usual duties and activities</b>                |
| 893 | The patient experiences certain symptoms caused by stroke, no matter physically or cognitively (for example           |
| 894 | those affecting speaking, reading, or writing; physical movement; feeling; visual sense; swallowing; or               |
| 895 | emotion), but the patient is still able to engage in all the work and social and leisure activities that he/she could |
| 896 | carry out prior to stroke. The key question used to distinguish grade 1 from grade 2 can be "Are there any things     |
| 897 | you did frequently in the past but can't do anymore after stroke?". Activities with a frequency more than once a      |
| 898 | month are considered "frequent".                                                                                      |
| 899 | <b>2-Slight disability; unable to perform all previous activities but able to look after own affairs without</b>      |
| 900 | <b>assistance</b>                                                                                                     |
| 901 | After stroke, the patient is unable to perform some previous activities that he/she could complete before stroke      |
| 902 | (e.g., driving, dancing, reading, or working), but the patient is still able to look after him/herself without        |
| 903 | assistance. The patient can dress, walk, eat, go to the bathroom, prepare simple food, go shopping, and travel        |
| 904 | locally without the help from others. And the patient can live without supervision. It is assumed that patients at    |
| 905 | this grade can live alone at home for one week or above in the absence of caregiver.                                  |
| 906 | <b>3-Moderate disability; requiring some help but able to walk without assistance</b>                                 |
| 907 | Patients at this grade can independently walk (with or without the help of a walking aid), dress, go to the           |
| 908 | bathroom, and eat, but an assistance is required for more complex tasks. For example, shopping, cooking, or           |
| 909 | cleaning needs to be done by someone else, and visiting the patient more than once a week is necessary to             |
| 910 | ensure that these activities can be completed. Assistance is needed not just for physical care, but more for          |
| 911 | advice: for example, patients at this grade will need supervision or encouragement to deal with their finances.       |
| 912 | <b>4-Moderately severe disability; unable to walk without assistance and unable to attend to own bodily</b>           |
| 913 | <b>needs without assistance</b>                                                                                       |
| 914 | The patient needs others' help with daily life, regardless of walking, dressing, going to the bathroom, or eating.    |
| 915 | The patient needs care for at least once a day, usually twice or more, or must live within close proximity of a       |
| 916 | caregiver. To distinguish grade 4 from grade 5, consider whether the patient is able to live alone normally during    |
| 917 | appropriate time spans within a day.                                                                                  |
| 918 | <b>5-Severe disability; bedridden, incontinent, and requiring constant nursing care and attention</b>                 |
| 919 | The patient needs to be taken care several times throughout the day and night, although no trained nurses are         |
| 920 | required.                                                                                                             |

921

**6-Death.**922 **Appendix 3. The National Institutes of Health Stroke Scale**

923 A patient is scored according to the form and results are recorded. Scores given cannot be changed. Scores  
 924 will reflect what the patient does, not what the clinician thinks the patient can do. The clinician will record  
 925 answers while administering the exam and work quickly. Except where indicated, the patient will not be  
 926 coached (i.e., repeated requests to patient to make a special effort). Detailed explanation will be provided in the  
 927 form for items that are not assessed.

|    | <b>Instructions</b>                                                                                                                                                                                                                                                                                                                                                                                                                                                                                                                                                                                        | <b>Score</b>                                                                                                                                                                                                                                                                                                                                                                       |
|----|------------------------------------------------------------------------------------------------------------------------------------------------------------------------------------------------------------------------------------------------------------------------------------------------------------------------------------------------------------------------------------------------------------------------------------------------------------------------------------------------------------------------------------------------------------------------------------------------------------|------------------------------------------------------------------------------------------------------------------------------------------------------------------------------------------------------------------------------------------------------------------------------------------------------------------------------------------------------------------------------------|
| 1a | Level of consciousness (LOC):<br>The investigator must choose a response if a full evaluation is prevented by such obstacles (e.g., an endotracheal tube, language barrier, orotracheal trauma/bandages). A 3 is scored only if the patient makes no movement (other than reflexive posturing) in response to noxious stimulation.                                                                                                                                                                                                                                                                         | 0 = Alert; keenly responsive<br>1 = Not alert; but arousable by minor stimulation to obey, answer, or respond<br>2 = Not alert; requires repeated stimulation to attend, or is obtunded and requires strong or painful stimulation to make movements (not stereotyped)<br>3 = Responds only with reflex motor or autonomic effects or totally unresponsive, flaccid, and areflexic |
| 1b | LOC questions:<br>(It is important that only the initial answer be graded and that the examiner not give any cues) The patient is asked the month and his/her age. The answer must be correct — there is no partial credit for being close. Aphasic and stuporous patients who do not comprehend the questions will score 2. Patients unable to speak because of endotracheal intubation, orotracheal trauma, severe dysarthria from any cause, language barrier, or any other problem not secondary to aphasia are given a 1.                                                                             | 0 = Answers both questions correctly<br>1 = Answers one question correctly<br>2 = Answers neither question correctly or unable to speak                                                                                                                                                                                                                                            |
| 1c | LOC commands:<br>The patient is asked to open and close the eyes and then to grip and release the non-paretic hand. Substitute another one step command if the hands cannot be used (extend tongue). Only the first attempt is scored. Credit is given if an unequivocal attempt is made but not completed due to weakness. If the patient does not respond to command, the task will be demonstrated to him or her (pantomime), and the result scored (i.e., follows none, one or two commands). Patients with trauma, amputation, or other physical impediments will be given suitable one-step command. | 0 = Performs both tasks correctly<br>1 = Performs one task correctly<br>2 = Performs neither task correctly                                                                                                                                                                                                                                                                        |
| 2  | Best gaze:<br>Only horizontal eye movements will be tested. Voluntary or reflexive (oculocephalic) eye movements will be scored, but caloric testing is not done. If the patient has a conjugate deviation of the eyes that can be overcome by voluntary or reflexive activity, the score will be 1. If a patient has an isolated peripheral nerve paresis (CN III, IV, or V), score a 1. Gaze is testable in all aphasic                                                                                                                                                                                  | 0 = Normal<br>1 = Partial gaze palsy (gaze is abnormal in one or both eyes, but forced deviation or total gaze paresis is not present)<br>2 = Forced deviation, or total gaze paresis not overcome by the oculocephalic maneuver                                                                                                                                                   |



|    | Instructions                                                                                                                                                                                                                                                                                                                                                                                                                                                                                                                                                                                                                       | Score                                                                                                                                                                                                                                                                                                                                                                                                                                                             |
|----|------------------------------------------------------------------------------------------------------------------------------------------------------------------------------------------------------------------------------------------------------------------------------------------------------------------------------------------------------------------------------------------------------------------------------------------------------------------------------------------------------------------------------------------------------------------------------------------------------------------------------------|-------------------------------------------------------------------------------------------------------------------------------------------------------------------------------------------------------------------------------------------------------------------------------------------------------------------------------------------------------------------------------------------------------------------------------------------------------------------|
|    | patients. Patients with ocular trauma, bandages, pre-existing blindness, or other disorder of visual acuity or fields will be tested with reflexive movements, and a choice made by the investigator. Establishing eye contact and then moving about the patient from side to side will occasionally clarify the presence of a partial gaze palsy.                                                                                                                                                                                                                                                                                 |                                                                                                                                                                                                                                                                                                                                                                                                                                                                   |
| 3  | Visual fields:<br>Visual fields (upper and lower quadrants) are tested using finger counting or visual threat, as appropriate. Patients may be encouraged, but if they look at the side of the moving fingers appropriately, this can be scored as normal. If there is unilateral blindness or enucleation, visual fields in the remaining eye are scored. Score 1 only if a clear-cut asymmetry, including quadrantanopia, is found. If patient is blind from any cause, score 3. Double simultaneous stimulation is performed at this point. If the patient is dying, score a 1, and the results are used to respond to item 11. | 0 = No visual loss<br>1 = Partial hemianopia<br>2 = Complete hemianopia<br>3 = Bilateral hemianopia (blind including cortical blindness)                                                                                                                                                                                                                                                                                                                          |
| 4  | Facial palsy:<br>Ask — or use pantomime to encourage — the patient to show teeth or raise eyebrows and close eyes. Score symmetry of grimace in response to noxious stimuli in the poorly responsive or non-comprehending patient. If facial trauma/bandages, orotracheal tube, tape, or other physical barriers obscure the face, these will be removed to the extent possible.                                                                                                                                                                                                                                                   | 0 = Normal<br>1 = Minor paralysis (flattened nasolabial fold, asymmetry on smiling)<br>2 = Partial paralysis (total or near-total paralysis of lower face, central paralysis)<br>3 = Complete paralysis (of one or both sides, absence of facial movement in the upper and lower face, peripheral paralysis)                                                                                                                                                      |
| 5a | Left motor arm:<br>Extend the arm: 90 degrees if sitting or 45 degrees if supine. Drift is scored if the arm falls before 10 seconds. The aphasic patient is encouraged using urgency in the voice and pantomime, but not noxious stimulation. The assessor can lift the patient's arm to the required position and encourage the patient to hold on. Assess the affected side only.                                                                                                                                                                                                                                               | 0 = No drift; limb holds 90 (or 45) degrees for full 10 seconds<br>1 = Drift; limb holds 90 (or 45) degrees, but drifts down before full 10 seconds; does not hit bed or other support<br>2 = Some effort against gravity; limb cannot get to or maintain (if cued) 90 (or 45) degrees, drifts down to bed, but has some effort against gravity<br>3 = No effort against gravity; limb falls<br>4 = No movement<br>9 = Amputation or joint fusion, explain: _____ |
| 5b | Right motor arm:<br>Extend the arm: 90 degrees if sitting or 45 degrees if supine. Drift is scored if the arm falls before 10 seconds. The aphasic patient is encouraged using urgency in the voice and pantomime, but not noxious stimulation. The assessor can lift the patient's arm to the required position and encourage the patient to hold on. Assess the affected side only.                                                                                                                                                                                                                                              | 0 = No drift; limb holds 90 (or 45) degrees for full 10 seconds<br>1 = Drift; limb holds 90 (or 45) degrees, but drifts down before full 10 seconds; does not hit bed or other support<br>2 = Some effort against gravity; limb cannot get to or maintain (if cued) 90 (or 45) degrees, drifts down to bed, but has some effort against gravity<br>3 = No effort against gravity; limb falls<br>4 = No movement<br>9 = Amputation or joint fusion, explain: _____ |
| 6a | Left motor leg:<br>Hold the leg at 30 degrees (always tested supine). Drift is                                                                                                                                                                                                                                                                                                                                                                                                                                                                                                                                                     | 0 = No drift; leg holds 30-degree position for full 5 seconds                                                                                                                                                                                                                                                                                                                                                                                                     |

|    | Instructions                                                                                                                                                                                                                                                                                                                                                                                                                                                                                                                                                                                                                                                                                                                                                                                       | Score                                                                                                                                                                                                                                                                                                                                                                                |
|----|----------------------------------------------------------------------------------------------------------------------------------------------------------------------------------------------------------------------------------------------------------------------------------------------------------------------------------------------------------------------------------------------------------------------------------------------------------------------------------------------------------------------------------------------------------------------------------------------------------------------------------------------------------------------------------------------------------------------------------------------------------------------------------------------------|--------------------------------------------------------------------------------------------------------------------------------------------------------------------------------------------------------------------------------------------------------------------------------------------------------------------------------------------------------------------------------------|
|    | scored if the leg falls before 5 seconds. The aphasic patient is encouraged using urgency in the voice and pantomime, but not noxious stimulation. The assessor can lift the patient's leg to the required position and encourage the patient to hold on. Assess the affected side only.                                                                                                                                                                                                                                                                                                                                                                                                                                                                                                           | 1 = Drift; leg falls by the end of the 5-second period but does not hit bed<br>2 = Some effort against gravity; leg falls to bed by 5 seconds, but has some effort against gravity<br>3 = No effort against gravity; leg falls to bed immediately<br>4 = No movement<br>9 = Amputation or joint fusion, explain: __                                                                  |
| 6b | Right motor leg:<br>Hold the leg at 30 degrees (always tested supine). Drift is scored if the leg falls before 5 seconds. The aphasic patient is encouraged using urgency in the voice and pantomime, but not noxious stimulation. The assessor can lift the patient's leg to the required position and encourage the patient to hold on. Assess the affected side only.                                                                                                                                                                                                                                                                                                                                                                                                                           | 0 = No drift; leg holds 30-degree position for full 5 seconds<br>1 = Drift; leg falls by the end of the 5-second period but does not hit bed<br>2 = Some effort against gravity; leg falls to bed by 5 seconds, but has some effort against gravity<br>3 = No effort against gravity; leg falls to bed immediately<br>4 = No movement<br>9 = Amputation or joint fusion, explain: __ |
| 7  | Limb ataxia:<br>This item is aimed at finding evidence of a unilateral cerebellar lesion. Test with eyes open. In case of visual defect, ensure testing is done in intact visual field. The finger-nose-finger and heel-shin tests are performed on both sides, and ataxia is scored only if present out of proportion to weakness. Ataxia is absent in the patient who cannot understand or is paralyzed. In case of blindness, test by having the patient touch nose from extended arm position. Only in the case of amputation or joint fusion, the examiner will record the score as 9, and clearly write the explanation for this choice.                                                                                                                                                     | 0 = Absent<br>1 = Present in one limb<br>2 = Present in two or more limbs                                                                                                                                                                                                                                                                                                            |
| 8  | Sensory:<br>Examine with a pin. Sensation or grimace to pinprick when tested, or withdrawal from noxious stimulus in the obtunded or aphasic patient. Only sensory loss attributed to stroke is scored as abnormal. The examiner will test as many body areas: arms (not hands), legs, trunk, and face as needed to accurately check for hemisensory loss. A score of 2 "severe or total sensory loss" will only be given when a severe or total loss of sensation can be clearly demonstrated. Stuporous and aphasic patients will, therefore, probably score 1 or 0. The patient with brainstem stroke who has bilateral loss of sensation is scored 2. If the patient does not respond and is quadriplegic, score 2. Patients in a coma (item 1a = 3) are automatically given a 2 on this item. | 0 = Normal; no sensory loss<br>1 = Mild-to-moderate sensory loss; patient feels pinprick is less sharp or is dull on the affected side; or there is a loss of superficial pain with pinprick, but patient is aware of being touched<br>2 = Severe to total sensory loss; patient is not aware of being touched in the face, arm, and leg                                             |
| 9  | Best language:<br>Naming and reading tests. The patient is asked to name the items on the attached naming sheet and to read from the attached list of sentences. Comprehension is judged from responses here, as well as to all the commands in the preceding general neurological exam. If visual loss                                                                                                                                                                                                                                                                                                                                                                                                                                                                                            | 0 = No aphasia; normal<br>1 = Mild-to-moderate aphasia; some obvious loss of fluency or facility of comprehension, without significant limitation on ideas expressed or form of expression.<br>2 = Severe aphasia; all communication is                                                                                                                                              |

|    | Instructions                                                                                                                                                                                                                                                                                                                                                                                                                                                                                                                                                                                                                                                                                                                                                                                                                                                                                       | Score                                                                                                                                                                                                                                                                                                                                                          |
|----|----------------------------------------------------------------------------------------------------------------------------------------------------------------------------------------------------------------------------------------------------------------------------------------------------------------------------------------------------------------------------------------------------------------------------------------------------------------------------------------------------------------------------------------------------------------------------------------------------------------------------------------------------------------------------------------------------------------------------------------------------------------------------------------------------------------------------------------------------------------------------------------------------|----------------------------------------------------------------------------------------------------------------------------------------------------------------------------------------------------------------------------------------------------------------------------------------------------------------------------------------------------------------|
|    | interferes with the tests, ask the patient to identify objects placed in the hand, repeat, and produce speech. The intubated patient will be asked to write. The patient in a coma (item 1a = 3) will automatically score 3 on this item. The examiner must choose a score for the patient with stupor or limited cooperation, but a score of 3 will be used only if the patient is mute and follows no one-step commands.                                                                                                                                                                                                                                                                                                                                                                                                                                                                         | through fragmentary expression; great need for inference, questioning, and guessing by the listener. Range of information that can be exchanged is limited; listener carries burden of communication. Examiner cannot identify materials provided from patient response.<br>3 = Mute, global aphasia; no usable speech or auditory comprehension               |
| 10 | <b>Dysarthria:</b><br>Do not tell the patient why he or she is being tested. Ask the patient to read or repeat words from the attached list. If the patient has severe aphasia, the clarity of articulation of spontaneous speech can be rated. Only if the patient is intubated or has other physical barriers to producing speech, the examiner will record the score as 9, and clearly write the explanation for this choice.                                                                                                                                                                                                                                                                                                                                                                                                                                                                   | 0 = Normal<br>1 = Mild-to-moderate dysarthria; patient slurs at least some words and, at worst, can be understood with some difficulty<br>2 = Severe dysarthria; patient's speech is so slurred as to be unintelligible in the absence of or out of proportion to any dysphasia, or is mute/anarthric<br>9 = Intubated or other physical barriers, explain: __ |
| 11 | <b>Neglect:</b><br>If the patient has a severe visual loss preventing visual double simultaneous stimulation, and the cutaneous stimuli are normal, the score is normal. If the patient has aphasia but does appear to attend to both sides, the score is normal. Neglect is identified by examining the patient's ability to recognize simultaneous bilateral skin sensory and visual stimuli. Show the patient the standard picture and ask him/her to describe it. The doctor can encourage the patient to view carefully and identify features on the left and right. If the patient fails to recognize part of the image on one side, the score is abnormal. The doctor will then ask the patient to close his/her eyes and test response to pinprick in the arm or leg to examine bilateral skin sensation. The presence of sensory neglect on one side is taken as evidence of abnormality. | 0 = No abnormality<br>1 = Visual, tactile, auditory, spatial, or personal inattention or extinction to bilateral simultaneous stimulation in one of the sensory modalities<br>2 = Profound hemi-inattention or extinction to more than one modality; does not recognize own hand or orients to only one side of space                                          |

928

929

930 **Appendix 4. EuroQoL Group 5-Dimension Questionnaire**

|                                                                                   |                                                                                                                                                                                                                                                   |
|-----------------------------------------------------------------------------------|---------------------------------------------------------------------------------------------------------------------------------------------------------------------------------------------------------------------------------------------------|
| Under each heading, please tick the one box that best describes your health today |                                                                                                                                                                                                                                                   |
| Mobility                                                                          | <input type="checkbox"/> 1 I have no problems in walking about<br><input type="checkbox"/> 2 I have some problems in walking about<br><input type="checkbox"/> 3 I am confined to bed                                                             |
| Self-care                                                                         | <input type="checkbox"/> 1 I have no problems with self-care<br><input type="checkbox"/> 2 I have some problems washing, bathing, or dressing myself<br><input type="checkbox"/> 3 I am unable to wash, bath, or dress myself                     |
| Usual activities<br>(e.g., work, study, housework, family, or leisure activities) | <input type="checkbox"/> 1 I have no problems with performing my usual activities<br><input type="checkbox"/> 2 I have some problems with performing my usual activities<br><input type="checkbox"/> 3 I am unable to perform my usual activities |
| Pain/Discomfort                                                                   | <input type="checkbox"/> 1 I have no pain or discomfort<br><input type="checkbox"/> 2 I have moderate pain or discomfort<br><input type="checkbox"/> 3 I have extreme pain or discomfort                                                          |
| Anxiety/Depression                                                                | <input type="checkbox"/> 1 I am not anxious or depressed<br><input type="checkbox"/> 2 I am moderately anxious or depressed<br><input type="checkbox"/> 3 I am extremely anxious or depressed                                                     |

931

932

933 To help you know how good or bad your health is today; we  
934 draw a scale (kind of like a temperature meter). On this  
935 scale, 100 means the best health you can imagine, and 0  
936 means the worst health you can imagine.

937

938 Please make a mark on the scale on the right to indicate how  
939 your health is today. Please draw a line from one of the  
940 boxes below to the point on the scale that can best represent  
941 your health today.

942

943

944

945

946

947

948

949

950

951

952

953

954

955

**YOUR HEALTH TODAY**

**The questionnaire is completed by:**

- 1 Patient
- 2 Patient with the assistance of a third person
- 3 Proxy (patient's family member)

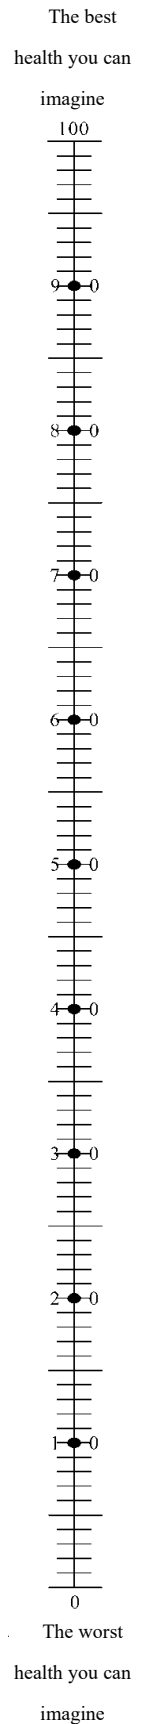

956 **Appendix 5. Barthel Index**

| Item                                      | Scoring criteria                                                                                                                                                                                                                                                                                                 |
|-------------------------------------------|------------------------------------------------------------------------------------------------------------------------------------------------------------------------------------------------------------------------------------------------------------------------------------------------------------------|
| Feeding                                   | <input type="checkbox"/> 0 Dependent<br><input type="checkbox"/> 5 Needs some help<br><input type="checkbox"/> 10 Independent                                                                                                                                                                                    |
| Bathing                                   | <input type="checkbox"/> 0 Dependent<br><input type="checkbox"/> 5 Independent                                                                                                                                                                                                                                   |
| Grooming (face, hair, teeth, shaving)     | <input type="checkbox"/> 0 Needs help<br><input type="checkbox"/> 5 Independent                                                                                                                                                                                                                                  |
| Dressing (buttons, zips, laces)           | <input type="checkbox"/> 0 Dependent<br><input type="checkbox"/> 5 Needs some help<br><input type="checkbox"/> 10 Independent                                                                                                                                                                                    |
| Bowels                                    | <input type="checkbox"/> 0 Incontinent or needs to be given enemas<br><input type="checkbox"/> 5 Occasional accident<br><input type="checkbox"/> 10 Continent                                                                                                                                                    |
| Bladder                                   | <input type="checkbox"/> 0 Incontinent or catheterized and unable to manage alone<br><input type="checkbox"/> 5 Occasional accident<br><input type="checkbox"/> 10 Continent                                                                                                                                     |
| Toilet use (on and off, dressing, wiping) | <input type="checkbox"/> 0 Dependent<br><input type="checkbox"/> 5 Needs some help<br><input type="checkbox"/> 10 Independent                                                                                                                                                                                    |
| Transfers (bed to chair and back)         | <input type="checkbox"/> 0 Unable, no sitting balance<br><input type="checkbox"/> 5 Major help (2 people, physical), can sit<br><input type="checkbox"/> 10 Minor help (1 person, verbal or physical)<br><input type="checkbox"/> 15 Independent                                                                 |
| Mobility (on level surfaces)              | <input type="checkbox"/> 0 Immobile or < 45 meters<br><input type="checkbox"/> 5 Wheelchair independent, including corners, > 45 meters<br><input type="checkbox"/> 10 Walks with help of 1 person (verbal or physical) > 45 meters<br><input type="checkbox"/> 15 Independent (but may use any aid) > 45 meters |
| Stairs                                    | <input type="checkbox"/> 0 Unable<br><input type="checkbox"/> 5 Needs help (physical, verbal, carrying aid)<br><input type="checkbox"/> 10 Independent                                                                                                                                                           |

957

958 **Efficacy and Safety of Panax Notoginseng Saponins in the Treatment of Adults with Ischemic Stroke in**  
959 **China: A Randomized Placebo-Controlled Clinical Trial**

960  
961  
962  
963  
964  
965  
966  
967  
968  
969  
970  
971  
972  
973  
974  
975  
976  
977  
978  
979  
980  
981  
982  
983  
984  
985  
986  
987  
988  
989  
990  
991  
992  
993  
994  
995  
996  
997

**Statistical Analysis Plan**  
**Version 1.0**

**May 10<sup>th</sup> 2018**

|      |                                              |                                                        |    |
|------|----------------------------------------------|--------------------------------------------------------|----|
| 998  |                                              | <b>Table of Contents for Statistical Analysis Plan</b> |    |
| 999  | Abbreviations or Terminology .....           |                                                        | 40 |
| 1000 | Main Text.....                               |                                                        | 41 |
| 1001 | 1. Overview .....                            |                                                        | 41 |
| 1002 | 1.1 Study Objective .....                    |                                                        | 41 |
| 1003 | 1.2 Population .....                         |                                                        | 41 |
| 1004 | 1.3 Study Design.....                        |                                                        | 41 |
| 1005 | 1.4 Sample Size .....                        |                                                        | 41 |
| 1006 | 1.5 Randomization Method .....               |                                                        | 41 |
| 1007 | 2. Efficacy Evaluation.....                  |                                                        | 41 |
| 1008 | 2.1 Primary Efficacy Outcome .....           |                                                        | 41 |
| 1009 | 2.2 Secondary Efficacy Outcomes .....        |                                                        | 41 |
| 1010 | 3. Safety Evaluation.....                    |                                                        | 42 |
| 1011 | 3.1 Primary Safety Outcome .....             |                                                        | 42 |
| 1012 | 3.2 Secondary Safety Outcomes.....           |                                                        | 42 |
| 1013 | 3.3 AEs.....                                 |                                                        | 42 |
| 1014 | 4. Selection of Datasets.....                |                                                        | 42 |
| 1015 | 4.1 Modified Intention-To-Treat Cohort ..... |                                                        | 42 |
| 1016 | 4.2 Per-Protocol Cohort.....                 |                                                        | 42 |
| 1017 | 4.3 Safety Cohort.....                       |                                                        | 43 |
| 1018 | 5. Statistical Analysis.....                 |                                                        | 43 |
| 1019 | 5.1 General Principles .....                 |                                                        | 43 |
| 1020 | 5.2 Study Population .....                   |                                                        | 44 |
| 1021 | 5.3 Efficacy Analysis.....                   |                                                        | 44 |
| 1022 | 5.4 Safety Analysis .....                    |                                                        | 45 |
| 1023 | 5.5 Subgroup Analysis.....                   |                                                        | 45 |
| 1024 |                                              |                                                        |    |



1025

**Abbreviations or Terminology**

| <b>Abbreviations or Terminology</b> | <b>Description</b>                           |
|-------------------------------------|----------------------------------------------|
| AE                                  | Adverse Event                                |
| BI                                  | Barthel Index                                |
| CI                                  | Confidence Interval                          |
| EQ-5D                               | EuroQoL Group 5-Dimension                    |
| HR                                  | Hazard Ratio                                 |
| IMP                                 | Investigational Medicinal Product            |
| mRS                                 | modified Rankin Scale                        |
| NIHSS                               | National Institutes of Health Stroke Scale   |
| OR                                  | Odds Ratio                                   |
| SAE                                 | Serious Adverse Event                        |
| TOAST                               | Trial of Org 10172 in Acute Stroke Treatment |

1026

1027

## Main Text

### 1028 1. Overview

#### 1029 1.1 Study Objective

1030 To investigate the efficacy and safety of panax notoginseng saponins (Xuesaitong soft capsules, XST) in  
1031 patients with ischemic stroke.

#### 1032 1.2 Population

1033 Patients with ischemic stroke.

#### 1034 1.3 Study Design

1035 This study will be a randomized, double-blind, placebo-controlled, multi-center clinical trial. Patients will be  
1036 randomized into two groups at a ratio of 1:1 to receive XST or placebo.

#### 1037 1.4 Sample Size

1038 A total of 3000 eligible patients will be enrolled.

1039 Based on the previous findings, assuming that the proportion of patients in the control group with the  
1040 modified Rankin Scale (mRS)  $\leq 2$  at 3 months is 45%, and the proportion in the XST group is relatively  
1041 increased by 12%, with the significant level of 0.05 and the power of 0.80, 1342 patients are required in each  
1042 group, and considering 10% lost to follow-up, 1492 patients are required in each group. Rounded to an integer,  
1043 this trial is expected to enroll 3000 patients.

#### 1044 1.5 Randomization Method

1045 For patients eligible for randomization, each center will assign randomization codes in strict sequential order.  
1046 Randomization codes will be generated by SAS 9.4 (SAS Institute, Inc, Cary, NC) through block randomization  
1047 to achieve a balance in the allocation of patients between the two groups (1:1). The number of randomized  
1048 patients planned for this study is approximately 3000.

1049 At the Visit 1, the investigator will provide the randomization codes of patients to the dedicated drug-  
1050 distributing employees in the sequence of patient enrollment, and the employees will identify the unique  
1051 identification number on the drug box for drug supply at Visit 1. Patients will be required to complete the first  
1052 administration of the Investigational Medicinal Product (IMP) within 24 hours after randomization.

### 1053 2. Efficacy Evaluation

#### 1054 2.1 Primary Efficacy Outcome

1055 Proportion of patients with functional independence (mRS  $\leq 2$ ) at 3 months after randomization.

#### 1056 2.2 Secondary Efficacy Outcomes

- 1057 1. Proportion of recurrent stroke (ischemic stroke and intracerebral hemorrhage) at 3 months and 12 months  
1058 after randomization;
- 1059 2. Proportion of patients with functional independence (mRS  $\leq$  2) at 12 months after randomization;
- 1060 3. Proportion of patients with no or minimal disability (mRS  $\leq$  1) at 3 months and 12 months after  
1061 randomization;
- 1062 4. Change in NIHSS score at 3 months after randomization;
- 1063 5. Proportion of patients with composite cerebrovascular events (ischemic stroke, intracerebral hemorrhage,  
1064 myocardial infarction, and vascular death) at 3 months and 12 months after randomization;
- 1065 6. Difference of EuroQoL Group 5-Dimension (EQ-5D) score at 3 months and 12 months after randomization;
- 1066 7. Change in Barthel Index (BI) score at 3 months and 12 months after randomization;
- 1067 8. Difference of platelet counts and coagulation indicators (prothrombin time, and activated partial  
1068 thromboplastin time) at 3 months after randomization.

### 1069 **3. Safety Evaluation**

#### 1070 **3.1 Primary Safety Outcome**

1071 Incidence of serious adverse events (SAEs) within 3 months of treatment.

#### 1072 **3.2 Secondary Safety Outcomes**

- 1073 1. Incidence of symptomatic intracranial hemorrhage within 3 months of treatment;
- 1074 2. Incidence of all-cause mortality within 3 months of treatment;
- 1075 3. Incidence of adverse events (AEs) within 3 months of treatment.

#### 1076 **3.3 AEs**

1077 An AE is any adverse medical event occurring in a patient or a participant of the clinical trial after  
1078 administration, and the AE does not necessarily have a relationship with the treatment.

1079 A SAE is any unexpected clinical events occurring at any dose, such as: death, life threatening events  
1080 requiring hospitalization or prolonging hospitalization, leading to persistent or significant loss of function, and  
1081 congenital deformity or birth defects.

### 1082 **4. Selection of Datasets**

#### 1083 **4.1 Modified Intention-To-Treat Cohort**

1084 According to the basic principle of intention-to-treat analysis, all patients after randomization who received at  
1085 least one record for drug administration and efficacy evaluation will be included in the modified intention-to-  
1086 treat cohort. The modified intention-to-treat population will be the primary population for efficacy evaluation in  
1087 this study.

#### 1088 **4.2 Per-Protocol Cohort**

1089 Per-protocol cohort will include all patients who have completed the treatment prescribed in the protocol or  
1090 those without major violations of the trial protocol. The exact definition of major protocol violation will be  
1091 finalized during data review, generally including, but not limited to the following conditions: failure to meet the  
1092 primary inclusion criteria, treatment that seriously interferes with efficacy evaluation after enrollment, poor  
1093 compliance, and follow-up that seriously exceeds the time window. Per-protocol population will be the  
1094 secondary population for efficacy evaluation.

#### 1095 **4.3 Safety Cohort**

1096 Safety cohort is defined as a collection of all patients who have received at least one dose of drug treatment.  
1097 Safety cohort will be the primary population for safety evaluation in this study.

### 1098 **5. Statistical Analysis**

#### 1099 **5.1 General Principles**

1100 This statistical analysis plan was formulated by biostatisticians and principal investigators according to the  
1101 study protocol, and will be well documented prior to data locking. SAS 9.4 (SAS Institute, Inc, Cary, NC) will  
1102 be used, and all hypothesis tests two-sided,  $\alpha = 0.05$ , with statistical significance set at  $p \leq 0.05$ .

1103 For continuous variables, non-missing number of patients, mean, standard deviation, median, minimum, and  
1104 maximum will be listed. The number of decimal places for the minimum and the maximum will be consistent  
1105 with those recorded in the database. The mean and median will have one more decimal place than those of the  
1106 original data recorded in the database, while the standard deviation will have two more decimal places than  
1107 those of the original data recorded in the database. For categorical variables, frequency tables (frequencies and  
1108 percentages) will be listed. Percentages will be rounded to one decimal place.

##### 1109 **5.1.1 Significant Level**

1110 All hypothesis tests will be two-sided ( $\alpha = 0.05$ ), with statistical significance set at  $p \leq 0.05$  and 95%  
1111 confidence interval (CI).

##### 1112 **5.1.2 Hypothesis Test**

1113 The primary efficacy outcome will be the proportion of patients with functional independence (mRS  $\leq 2$ ) at 3  
1114 months after randomization.

1115 Chi-square test will be used for inter-group comparison:

1116  $H_0$ : The proportion of patients with functional independence (mRS  $\leq 2$ ) at 3 months after randomization  
1117 will be equal in the two groups

1118  $H_1$ : The proportion of patients with functional independence (mRS  $\leq 2$ ) at 3 months after randomization  
1119 will not be equal in the two groups

1120  $\alpha = 0.05$  (two-sided)

##### 1121 **5.1.3 Estimation of Missing Values**

1122 The missing values of the primary efficacy outcome will be estimated by last observation carried forward  
1123 method, and the missing values of the secondary efficacy outcomes will not be estimated.

## 1124 **5.2 Study Population**

### 1125 **5.2.1 Case Distribution**

1126 Description of the actual enrollment, dropouts, excluded cases, completion of scheduled treatment, and  
1127 premature discontinuation for the patients at each center: number of patients, and percentage.

1128 Patient distribution in each dataset defined as the modified intention-to-treat cohort, per-protocol cohort, and  
1129 safety cohort.

1130 Description of dropouts and excluded cases one by one: medication and reasons for early withdrawal.

### 1131 **5.2.2 Protocol Violations and Deviations**

1132 Summary and description of protocol violations and deviations.

### 1133 **5.2.3 Demographic Characteristics, Disease Characteristics, and Medical History**

- 1134 • Age: described with mean, standard deviation, maximum, minimum, and median;
- 1135 • Gender, nationality, marital status, education, type of medical insurance, per capita monthly household  
1136 income, and occupation: proportions will be calculated;
- 1137 • Past history (history and onset time of ischemic stroke, transient ischemic attack, myocardial infarction,  
1138 hypertension, and hyperlipidemia): proportions will be calculated;
- 1139 • Personal history/family history (such as smoking, drinking, family history of stroke, and family history of  
1140 hypertension): proportions will be calculated;
- 1141 • Previous medication history (such as XST, anti-platelet drugs, and heparin usage): proportions will be  
1142 calculated;
- 1143 • Physical examination on admission (body height, body weight, body mass index, waist circumference,  
1144 body temperature, respiratory rate, heart rate, pulse, and blood pressure): described with mean, standard  
1145 deviation, maximum, minimum, and median;
- 1146 • Physical examination at screening including baseline mRS, National Institutes of Health Stroke Scale  
1147 (NIHSS), Alberta Stroke Program Early CT Score, EQ-5D, and BI scores: Described with mean, standard  
1148 deviation, maximum, minimum, and median;
- 1149 • Trial of Org 10172 in Acute Stroke Treatment (TOAST) classification: The proportions will be calculated.

## 1150 **5.3 Efficacy Analysis**

1151 Efficacy analysis will be based on the modified intention-to-treat cohort and per-protocol cohort.

### 1152 **5.3.1 Primary Efficacy Outcome**

1153 Proportion of patients with functional independence (mRS  $\leq 2$ ) at 3 months after randomization.

1154 According to the basic principle of intention-to-treat analysis, chi-square test will be used for data in the  
1155 modified intention-to-treat cohort to evaluate efficacy. In addition, a logistic regression model will be adopted to  
1156 calculate the odds ratio (OR) and 95% CI between the two treatment regimens.

1157 **5.3.2 Secondary Efficacy Outcomes**

- 1158 1. Proportion of patients with recurrent stroke (ischemic stroke and intracerebral hemorrhage) at 3 months  
1159 and 12 months after randomization:  
1160 Chi-square test or Fisher's exact test will be used for inter-group comparison. Cox proportional hazards  
1161 models will be established to calculate hazard ratios (HR) and 95% CI.
- 1162 2. Proportion of patients with functional independence (mRS  $\leq$  2) at 12 months after randomization:  
1163 Chi-square test or Fisher's exact test will be used for inter-group comparison. A logistic regression model  
1164 will be established to calculate OR and 95% CI.
- 1165 3. Proportion of patients with no or minimal disability (mRS  $\leq$  1) at 3 months and 12 months after  
1166 randomization:  
1167 Chi-square test or Fisher's exact test will be used for inter-group comparison. Logistic regression models  
1168 will be established to calculate OR and 95% CI.
- 1169 4. Change in NIHSS score at 3 months after randomization:  
1170 Student's t-test or Wilcoxon rank-sum test will be used for inter-group comparison.
- 1171 5. Proportion of patients with composite cerebrovascular events (ischemic stroke, intracerebral hemorrhage,  
1172 myocardial infarction, and vascular death) at 3 months and 12 months after randomization:  
1173 Chi-square test or Fisher's exact test will be used for inter-group comparison. Cox proportional hazards  
1174 models will be established to calculate HR and 95% CI.
- 1175 6. Difference of EQ-5D score at 3 months and 12 months after randomization:  
1176 Student's t-test or Wilcoxon rank-sum test will be used for inter-group comparison.
- 1177 7. Change in BI score at 3 months and 12 months after randomization:  
1178 Student's t-test or Wilcoxon rank-sum test will be used for inter-group comparison.
- 1179 8. Difference of platelet counts and coagulation indicators (prothrombin time, and activated partial  
1180 thromboplastin time) at 3 months after randomization:  
1181 Student's t-test or Wilcoxon rank-sum test will be used for inter-group comparison.

1182 **5.4 Safety Analysis**

1183 **5.4.1 Primary Safety Outcome**

- 1184 Incidence of SAEs within 3 months of treatment.  
1185 Chi-square test or Fisher's exact test will be used for inter-group comparison.

1186 **5.4.2 Secondary Safety Outcomes**

- 1187 1. Incidence of symptomatic intracranial hemorrhage within 3 months of treatment:  
1188 Chi-square test or Fisher's exact test will be used for inter-group comparison.
- 1189 2. Incidence of all-cause mortality within 3 months of treatment:  
1190 Chi-square test or Fisher's exact test will be used for inter-group comparison.
- 1191 3. Incidence of AEs within 3 months of treatment:  
1192 Chi-square test or Fisher's exact test will be used for inter-group comparison.

1193 **5.5 Subgroup Analysis**

1194 The primary efficacy outcome will be subdivided according to the following factors: TOAST classification  
1195 (large artery atherosclerosis, cardioembolism, small vessel occlusion, other determined etiology, or  
1196 undetermined etiology), age ( $< 65$  or  $\geq 65$  years), sex (male or female), diabetes (yes or no), and hypertension  
1197 (yes or no). Logistic regression models will be used to calculate the interactions between subgroup factors and  
1198 treatment assignments.
