# Supplementary material for: Efficacy and Safety of Panax notoginseng Saponins in the Treatment of Adults With Ischemic Stroke in China: A Randomized Clinical Trial
Source: PubMed Central journal article supplement — JAMA Netw Open. 2023 Jun 20;6(6):e2317574. doi: 10.1001/jamanetworkopen.2023.17574 (PMC10282883; doi:10.1001/jamanetworkopen.2023.17574), 2023-06-20
Supplement: jamanetwopen-e2317574-s002.pdf [file jamanetwopen-e2317574-s002.pdf]

## Supplementary Online Content

Wu L, Song H, Zhang C, et al. Efficacy and safety of Pannax notoginseng saponins in the treatment of adults with ischemic stroke in China. *JAMA Netw Open*. 2023;6(6):e2317574. doi:10.1001/jamanetworkopen.2023.17574

**eTable 1.** Efficacy Outcomes at 12 Months in the Modified Intention-to-Treat Cohort

**eTable 2.** Distribution of the Modified Rankin Scale at 3 Months in the Modified Intention-to-Treat Cohort

**eTable 3.** Efficacy Outcomes at 3 Months in the Per-Protocol Cohort

**eTable 4.** Efficacy Outcomes at 12 Months in the Per-Protocol Cohort

**eTable 5.** Medications and Status at 1 Month in the Modified Intention-to-Treat Cohort

**eFigure 1.** Distribution of the Modified Rankin Scale at 3 Months in the Per-Protocol Cohort

**eFigure 2.** Subgroup Analyses in the Per-Protocol Cohort

**eAppendix.** Trial Organization

This supplementary material has been provided by the authors to give readers additional information about their work.

**eTable 1. Efficacy Outcomes at 12 Months in the Modified Intention-To-Treat Cohort**

|                                                                            | XST group<br>(n=1487) | Control group<br>(n=1479) | OR/HR<br>(95% CI)   | P<br>value |
|----------------------------------------------------------------------------|-----------------------|---------------------------|---------------------|------------|
| <b>Secondary outcomes</b>                                                  |                       |                           |                     |            |
| Recurrent stroke, n (%)                                                    | 33 (2.2)              | 41 (2.8)                  | 0.80 (0.51 to 1.26) | 0.34       |
| Functional independence, n (%) <sup>a</sup>                                | 1342 (92.4)           | 1324 (91.5)               | 1.13 (0.87 to 1.48) | 0.36       |
| No or minimal disability, n (%) <sup>a</sup>                               | 1243 (85.6)           | 1191 (82.3)               | 1.27 (1.05 to 1.53) | 0.01       |
| Composite cerebrovascular events, n (%)                                    | 39 (2.6)              | 45 (3.0)                  | 0.86 (0.56 to 1.32) | 0.49       |
| EQ-5D score, median (IQR) <sup>a</sup>                                     | 95 (90, 98)           | 94 (90, 96)               | -                   | 0.009      |
| Barthel Index change from baseline to 12 months, median (IQR) <sup>a</sup> | 20 (5, 40)            | 20 (5, 40)                | -                   | 0.17       |

XST, Xuesaitong soft capsule; OR, odds ratio; HR, hazard ratio; CI, confidence interval; EQ-5D, EuroQoL Group 5-Dimension; IQR, interquartile range.

<sup>a</sup> Functional outcome data at 12 months were missing in 67 patients; Data of EQ-5D score at 12 months were missing in 84 patients; Data of Barthel Index change from baseline to 12 months were missing in 80 patients; The number of missing data was similar between the two groups.

**eTable 2. Distribution of the modified Rankin Scale at 3 months in the modified Intention-To-Treat Cohort**

| The score of modified Rankin Scale, n (%) | XST group (n=1487) | Control group (n=1479) |
|-------------------------------------------|--------------------|------------------------|
| 0                                         | 348 (23.4)         | 320 (21.6)             |
| 1                                         | 754 (50.7)         | 705 (47.7)             |
| 2                                         | 226 (15.2)         | 193 (13.1)             |
| 3                                         | 89 (6.0)           | 192 (13.0)             |
| 4                                         | 65 (4.4)           | 65 (4.4)               |
| 5                                         | 4 (0.3)            | 2 (0.1)                |
| 6                                         | 1 (0.1)            | 2 (0.1)                |

XST, Xuesaitong soft capsule.

**eTable 3. Efficacy Outcomes at 3 months in the Per-Protocol Cohort**

|                                                                           | XST group<br>(n=1081) | Control group<br>(n=1096) | OR/HR<br>(95% CI)   | P<br>value |
|---------------------------------------------------------------------------|-----------------------|---------------------------|---------------------|------------|
| <b>Primary outcome</b>                                                    |                       |                           |                     |            |
| Functional independence, n (%)                                            | 973 (90.0)            | 913 (83.3)                | 1.98 (1.51 to 2.60) | <0.001     |
| <b>Secondary outcomes</b>                                                 |                       |                           |                     |            |
| Recurrent stroke, n (%)                                                   | 9 (0.8)               | 9 (0.8)                   | 1.02 (0.40 to 2.56) | 0.98       |
| No or minimal disability, n (%)                                           | 813 (75.2)            | 774 (70.6)                | 1.26 (1.04 to 1.53) | 0.02       |
| NIHSS score change from baseline to 3 months, median (IQR) <sup>a</sup>   | -4 (-5, -3)           | -4 (-5, -3)               | -                   | 0.07       |
| Composite cerebrovascular events, n (%)                                   | 9 (0.8)               | 10 (0.9)                  | 0.91 (0.37 to 2.25) | 0.84       |
| EQ-5D score, median (IQR) <sup>a</sup>                                    | 90 (80, 95)           | 90 (80, 95)               | -                   | 0.10       |
| Barthel Index change from baseline to 3 months, median (IQR) <sup>a</sup> | 15 (5, 35)            | 15 (5, 30)                | -                   | 0.01       |
| <b>Platelet counts and coagulation indicators, median (IQR)</b>           |                       |                           |                     |            |
| Platelet counts, 10 <sup>9</sup> /L <sup>a</sup>                          | 215.5 (173, 255)      | 216 (178, 259)            | -                   | 0.14       |
| PT, s <sup>a</sup>                                                        | 11.5 (10.7, 12.5)     | 11.4 (10.6, 12.4)         | -                   | 0.63       |
| APTT, s <sup>a</sup>                                                      | 28.6 (24.8, 33.1)     | 28.1 (24.8, 33.1)         | -                   | 0.58       |

XST, Xuesaitong soft capsule; OR, odds ratio; HR, hazard ratio; CI, confidence interval; NIHSS, National Institutes of Health Stroke Scale; IQR, interquartile range; EQ-5D, EuroQoL Group 5-Dimension; PT, prothrombin time; APTT, activated partial thromboplastin time.

<sup>a</sup> Data of NIHSS score change from baseline to 3 months were missing in 40 patients; Data of EQ-5D score at 3 months were missing in 40 patients; Data of Barthel Index change from baseline to 3 months were missing in 40 patients; Data of platelet counts, PT, and APTT at 3 months were missing in 252, 287, and 297 patients, respectively. The number of missing data was similar between the two groups.

**eTable 4. Efficacy Outcomes at 12 months in the Per-Protocol Cohort**

|                                                                               | XST group<br>(n=1081) | Control group<br>(n=1096) | OR/HR<br>(95% CI)      | P<br>value |
|-------------------------------------------------------------------------------|-----------------------|---------------------------|------------------------|------------|
| Secondary outcomes                                                            |                       |                           |                        |            |
| Recurrent stroke, n (%)                                                       | 23 (2.1)              | 30 (2.7)                  | 0.78 (0.45<br>to 1.34) | 0.36       |
| Functional independence at 12<br>months, n (%) <sup>a</sup>                   | 982 (93.1)            | 990 (92.3)                | 1.13 (0.81<br>to 1.56) | 0.47       |
| No or minimal disability, n (%) <sup>a</sup>                                  | 918 (87.0)            | 894 (83.3)                | 1.34 (1.06<br>to 1.71) | 0.02       |
| Composite cerebrovascular events, n<br>(%)                                    | 26 (2.4)              | 32 (2.9)                  | 0.82 (0.49<br>to 1.38) | 0.46       |
| EQ-5D score, median (IQR) <sup>a</sup>                                        | 95 (90, 98)           | 95 (90, 96)               | -                      | 0.15       |
| Barthel Index change from baseline to<br>12 months, median (IQR) <sup>a</sup> | 20 (5, 40)            | 20 (5, 40)                | -                      | 0.21       |

XST, Xuesaitong soft capsule; OR, odds ratio; HR, hazard ratio; CI, confidence interval; EQ-5D, EuroQoL Group 5-Dimension; IQR, interquartile range.

<sup>a</sup> Functional outcome data at 12 months was missing in 49 patients; Data of EQ-5D score at 12 months were missing in 56 patients; Data of Barthel Index change from baseline to 12 months were missing in 54 patients. The number of missing data was similar between the two groups.

**eTable 5. Medications and Status at 1 month in the modified Intention-To-Treat Cohort**

|                                        | XST group (n=1487) | Control group (n=1479) | <i>P</i> value |
|----------------------------------------|--------------------|------------------------|----------------|
| Antithrombotic agents, n (%)           | 1434 (96.4)        | 1432 (96.8)            | 0.56           |
| Antihypertensive agents, n (%)         | 637 (42.8)         | 600 (40.6)             | 0.21           |
| Antidiabetic agents, n (%)             | 319 (21.5)         | 297 (20.1)             | 0.36           |
| Anticholesteremic agents, n (%)        | 939 (63.1)         | 919 (62.1)             | 0.57           |
| mRS score, median (IQR)                | 1 (1, 2)           | 1 (1, 2)               | 0.87           |
| Functional independence, n (%)         | 1161 (78.1)        | 1134 (76.7)            | 0.36           |
| NIHSS score, median (IQR) <sup>a</sup> | 3 (2, 4)           | 3 (2, 4)               | 0.76           |
| Rehabilitation therapy, n (%)          | 99 (6.7)           | 102 (6.9)              | 0.80           |

XST, Xuesaitong soft capsule; mRS, modified Rankin Scale; IQR, interquartile range; NIHSS, National Institutes of Health Stroke Scale.

<sup>a</sup> Data of NIHSS score were missing in 2 patients in XST group.

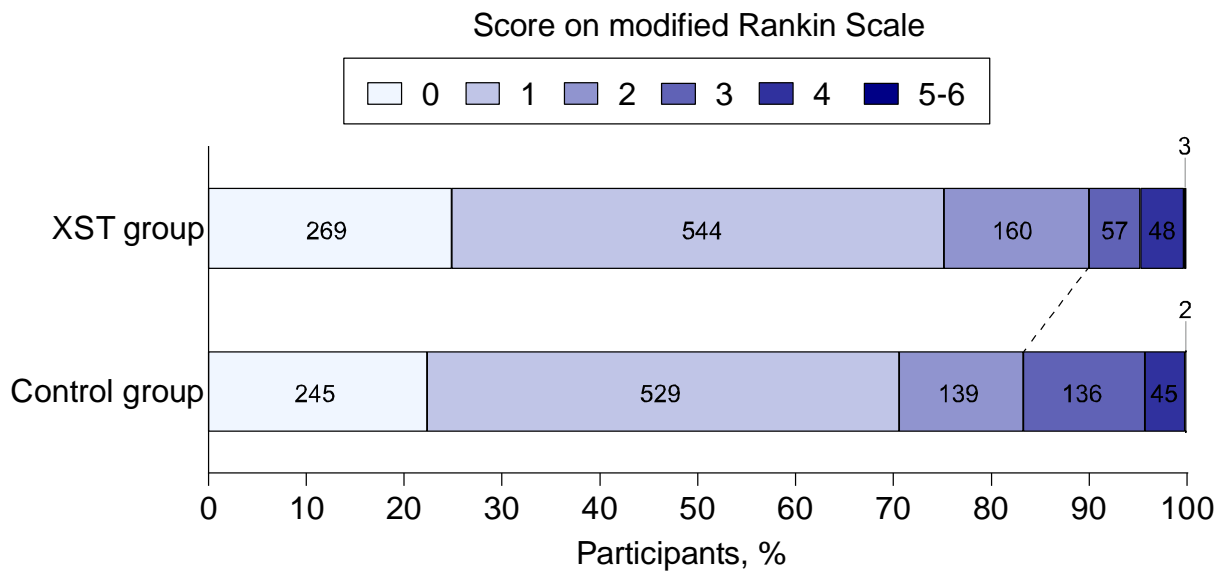

**eFigure 1. Distribution of the modified Rankin Scale at 3 months in the Per-Protocol Cohort**

XST, Xuesaitong soft capsule.

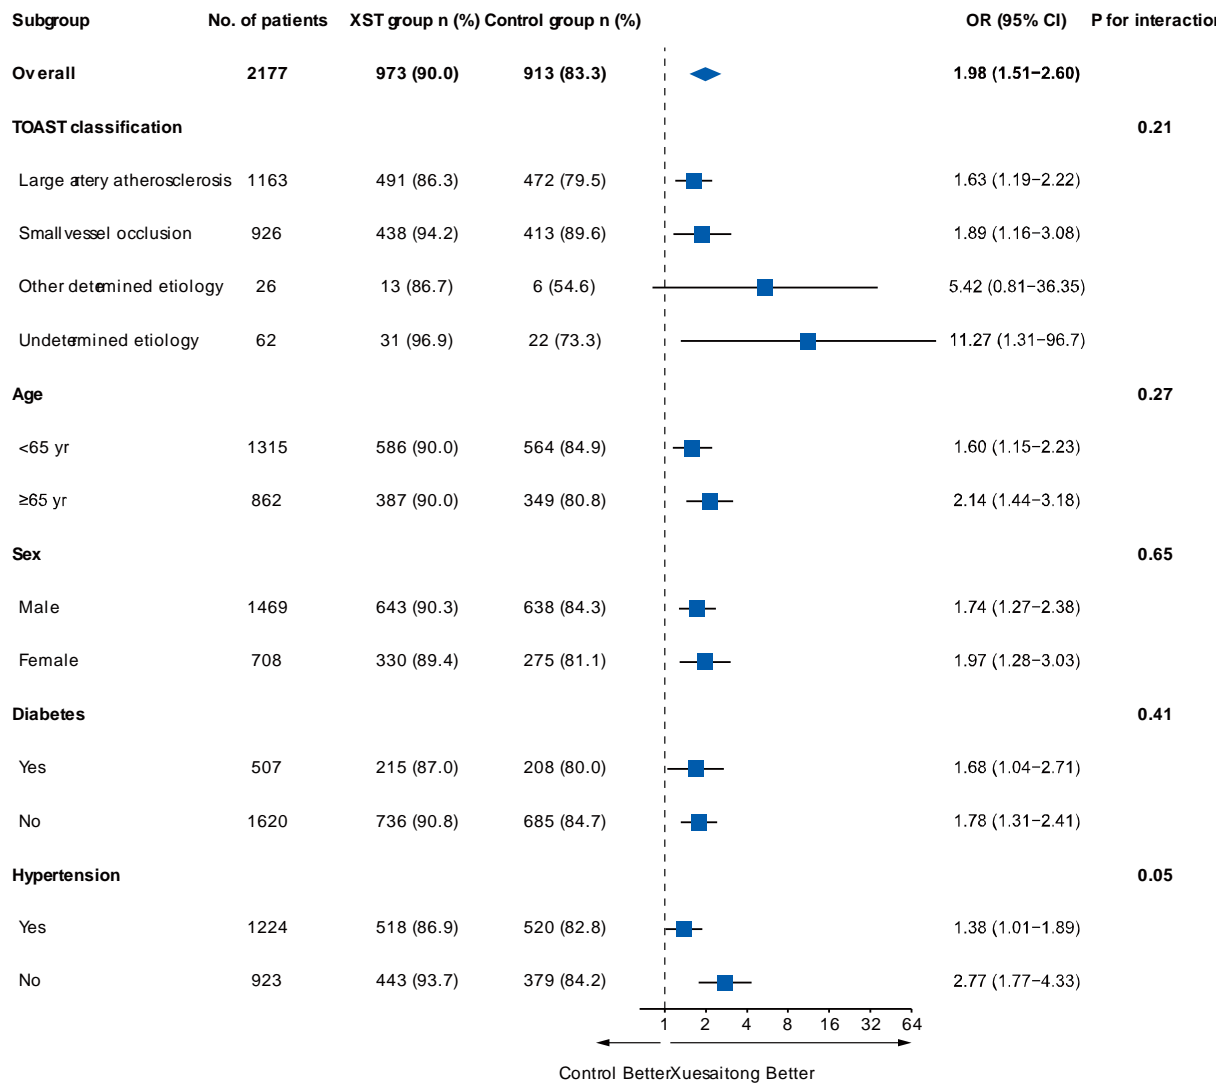

**eFigure 2. Subgroup Analyses in the Per-Protocol Cohort**

XST, Xuesaitong soft capsule; OR, odds ratio; CI, confidence interval; TOAST, Trial of Org 10172 in Acute Stroke Treatment.



## eAppendix. Trial Organization

### **Steering Committee:**

Xunming Ji; Ying Gao; Haiqing Song; Chi Zhang; Anxin Wang.

### **Executive Committee:**

Xunming Ji; Ying Gao; Haiqing Song; Longfei Wu; Chi Zhang; Luda Feng; Anxin Wang.

### **Clinical Centers (Principal Investigator):**

Xuanwu Hospital, Capital Medical University: Xunming Ji and Haiqing Song; Dongzhimen Hospital, Beijing University of Chinese Medicine: Ying Gao; First Affiliated Hospital of Anhui University of Science and Technology (First People's Hospital of Huainan): Mei Zhang; Dongfang Hospital, Beijing University of Chinese Medicine: Rongjuan Guo; Parrocket Force General Hospital: Lei Wang; The Second People's Hospital of Shenzhen: Lijie Ren; Zhuhai People's Hospital: Guangsen Cheng; Guizhou Provincial People's Hospital: Xiao Hu; Hengshui People's Hospital: Yan Wei; The First Hospital of Hebei Medical University: Yanyong Wang; The Third Hospital of Shijiazhuang: Zhigang Yao; The First Affiliated Hospital of Zhengzhou University: Yuming Xu; Henan Provincial People's Hospital: Liangfu Zhu; First People's Hospital of Zhengzhou City: Xiaoman Zhang; The Second Affiliated Hospital of Harbin Medical University: Lihua Wang; The Third People's Hospital of Hubei Province: Xiaoxiang Peng; The First People's Hospital of Wuhan: Guohua Chen; Xiangya Hospital, Central South University: Yunhai Liu; The Fourth Hospital of Changsha: Huiyun Yu; Xiangtan Central Hospital: Guangxiong Yuan; Nanjing First Hospital: Hongdong Zhao; The First Affiliated Hospital of Soochow University: Qi Fang; The Affiliated Hospital of Xuzhou Medical University: Deqin Geng; Jiangxi Provincial People's Hospital: Fan Hu; Liaocheng People's Hospital: Xiaofeng Yang; Shandong Provincial Hospital Affiliated to Shandong First Medical University: Chuanqiang Qu; Weihai Municipal Hospital: Zhenguang Li; Shanxi Provincial People's Hospital: Fengyun Hu; Hancheng Jiaoda Hospital: Meiyong Deng; Shanghai Pudong Hospital, Fudan University Pudong Medical Center: Shuangxing Hou; Tongji Hospital of Tongji University: Geyong Wang; Xinhua Hospital Affiliated to Shanghai Jiao Tong University School of Medicine: Zhenguo Liu; Changhai Hospital, Naval Medical University: Benqiang Deng; Shuguang Hospital Affiliated to Shanghai University of Traditional Chinese Medicine: Mingzhe Wang; West China Hospital, Sichuan University: Li He; Sichuan Provincial People's Hospital: Fuqiang Guo; The First People's Hospital of Yibin: Hao Li; Suining Central Hospital: Ming Yu; The Second Hospital of Tianjin Medical University: Xin Li; Tianjin Hospital of ITCWM-Nankai Hospital: Heng Wang; First Affiliated Hospital of Kunming Medical University: Lianmei Zhong; The Second Affiliated Hospital of Kunming Medical University: Mei Yin; Yan'an Hospital Affiliated to Kunming Medical University: Liping Zhan; Zigong First People's Hospital: Linming Huang; The Third People's Hospital of Mianyang: Bo Liu; Zigong Fourth People's Hospital: Guibin Wen; The People's Hospital of Dujiangyan: Zhong Zhang; Qinghe People's Hospital: Yingzhuo Zang; Anyang District Hospital: Jinxing Qi; The First Affiliated Hospital of Jiamusi University: Yaojia Jiang; Yanbian University Hospital: Meizi Jiang; Ankang Central Hospital: Kaifu Jiang; Zhengzhou Central Hospital: Runqing Wang; Luoyang Central Hospital Affiliated to Zhengzhou University: Congming Ma; Zhoukou Central Hospital: Lei Xia; Affiliated Hospital of Chengde Medical University: Yanjun Gao; Jiang'an County People's Hospital: Chiyu Xiong; Xuzhou First People's Hospital: Qing He; Jiangsu Province Hospital: Qi Niu; Dalian Municipal Central Hospital: Cui Wang; Linfen Central Hospital: Wanying Li; Gongxian People's Hospital, Yibin City: Jiping Long; Chifeng Municipal Hospital: Wenli Li; Hegang People's Hospital: Fugang Zhong; Hongqi Hospital Affiliated to Mudanjiang Medical University: Yindong Yang; Inner Mongolia Autonomous Region People's Hospital: Runxiu Zhu; Xianyang Hospital of Yanan University: Bingju Wang.

### **Data and Safety Monitoring Board:**

Yi Yang; Yun Xu; Xiuhua Guo.

### **Events Adjudication Committee:**

Huisheng Chen; Lan Chu; Tao Chen.

### **Data Management and Biostatistics:**

Anxin Wang; Yingting Zuo; Xiaoli Zhang.

### **Trial Coordination:**

Haiqing Song; Hong Zhang; Luda Feng.
