# Supplementary material for: Efficacy and Safety of Panax notoginseng Saponins in the Treatment of Adults With Ischemic Stroke in China: A Randomized Clinical Trial
Source: PubMed Central journal article supplement — JAMA Netw Open. 2023 Jun 20;6(6):e2317574. doi: 10.1001/jamanetworkopen.2023.17574 (PMC10282883; doi:10.1001/jamanetworkopen.2023.17574), 2023-06-20
Supplement: jamanetwopen-e2317574-s003.pdf [file jamanetwopen-e2317574-s003.pdf]

## Data Sharing Statement

Wu. Efficacy and Safety of Panax notoginseng Saponins in the Treatment of Adults With Ischemic Stroke in China. *JAMA Netw Open*. Published June 20, 2023.

doi:10.1001/jamanetworkopen.2023.17574

### Data

**Data available:** Yes

**Data types:** Deidentified participant data

**How to access data:** These data are available from the corresponding authors on reasonable request.

**When available:** With publication

### Supporting Documents

**Document types:** Statistical/analytic code, Informed consent form

**How to access documents:** These documents are available from the corresponding authors at [jixm@ccmu.edu.cn](mailto:jixm@ccmu.edu.cn).

**When available:** With publication

### Additional Information

**Who can access the data:** Only those researchers whose proposed use of the data has been approved.

**Types of analyses:** For a specified purpose.

**Mechanisms of data availability:** With a signed data access agreement.
